# Supplementary material for: Palladium-catalysed ortho-acylation of 6-anilinopurines/purine nucleosides via C–H activation
Source: Royal Society of Chemistry journal article supplement (doi:10.1039/c5ra18447a), 2015-01-01
Supplement: c5ra18447a1.pdf [file c5ra18447a1.pdf]

## Electronic Supplementary Information

### Palladium-catalysed *ortho*-acylation of 6-anilinopurines/purine nucleosides via

### C-H activation

Srinivasarao Allu and K. C. Kumara Swamy\*

School of Chemistry, University of Hyderabad, Hyderabad 500 046, Telangana, India.

E-mail: [kckssc@yahoo.com](mailto:kckssc@yahoo.com), [kckssc@uohyd.ac.in](mailto:kckssc@uohyd.ac.in)

|          |                                                           |               |
|----------|-----------------------------------------------------------|---------------|
| <b>1</b> | <b>ORTEP for compound 2m</b>                              | <b>S2</b>     |
| <b>2</b> | <b>Copies of <sup>1</sup>H/<sup>13</sup>C NMR Spectra</b> | <b>S3-S26</b> |

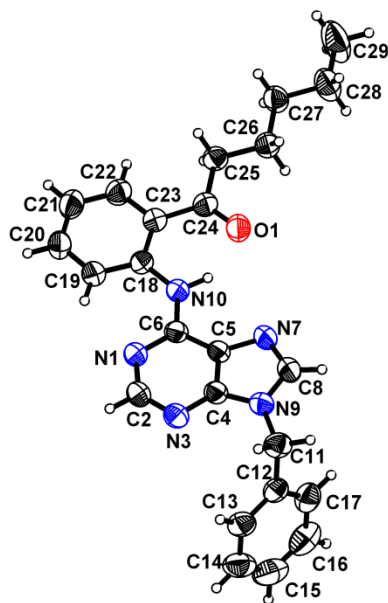

**Figure S1.** ORTEP for compound **2m**. Selected bond lengths [ $\text{\AA}$ ] with esd's in parentheses:  
C(24)-O(1) 1.2263(17), C(24)-C(23) 1.490(2), N(10)-C(18) 1.3964(19), N(10)-C(6) 1.3621(18),  
N(9)-C(11) 1.4604(18).

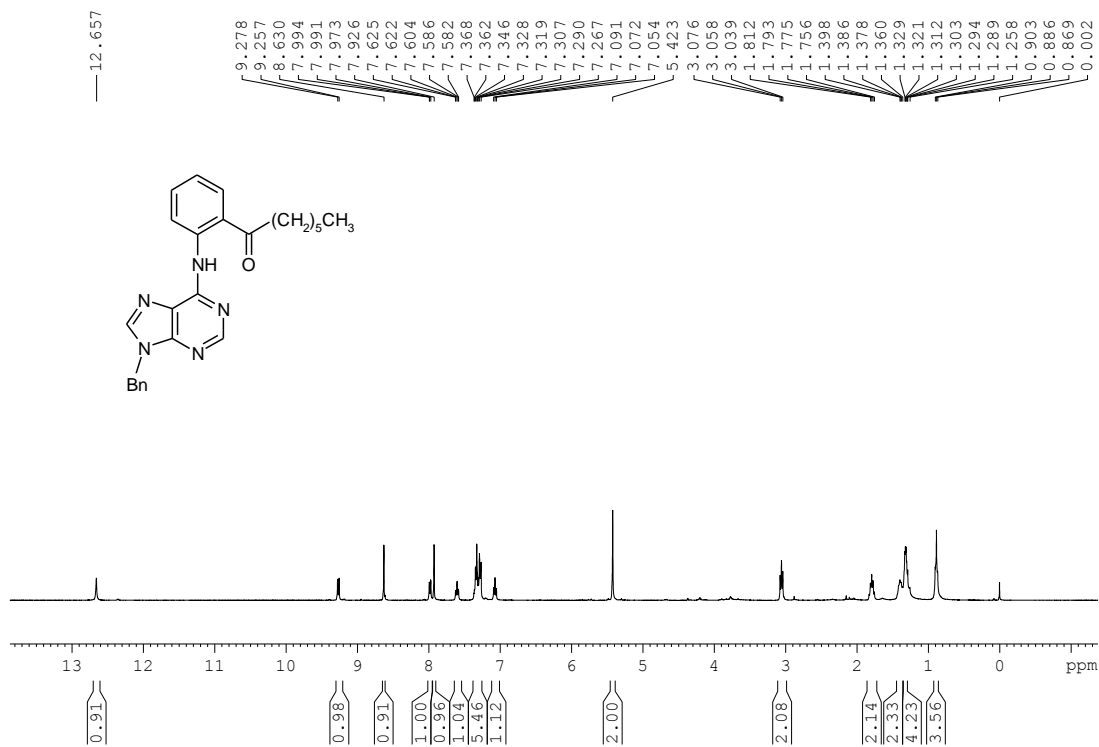

**Figure S2.**  $^1\text{H}$  NMR spectrum of compound **2a**

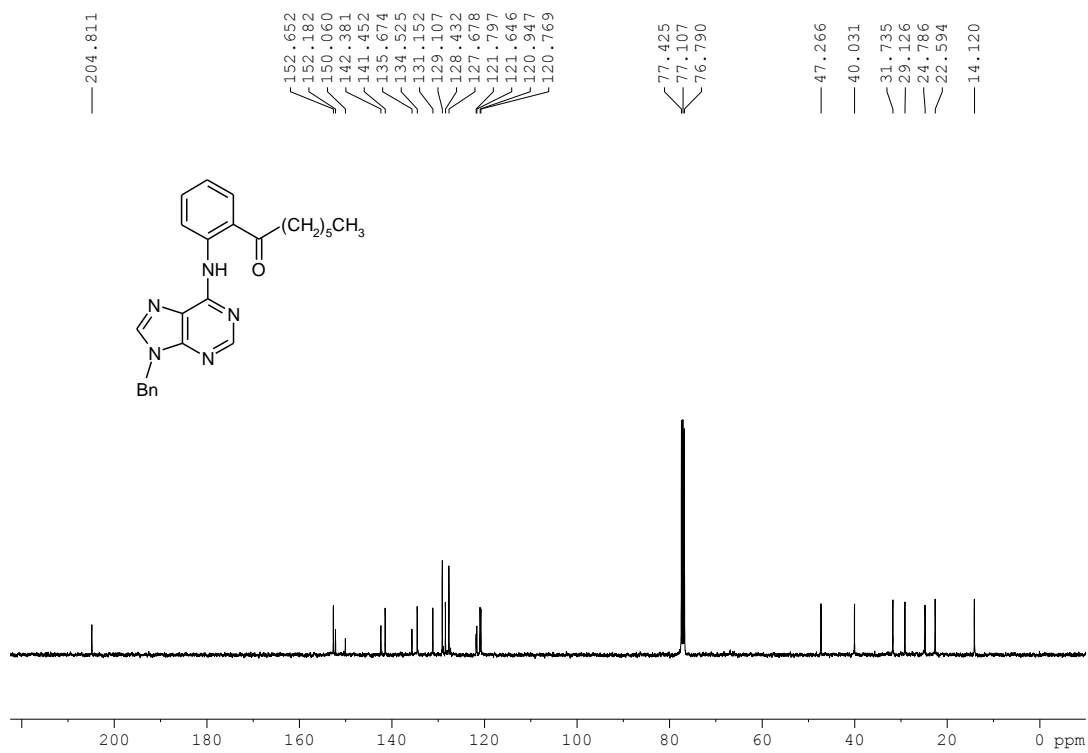

**Figure S3.**  $^{13}\text{C}$  NMR spectrum of compound **2a**

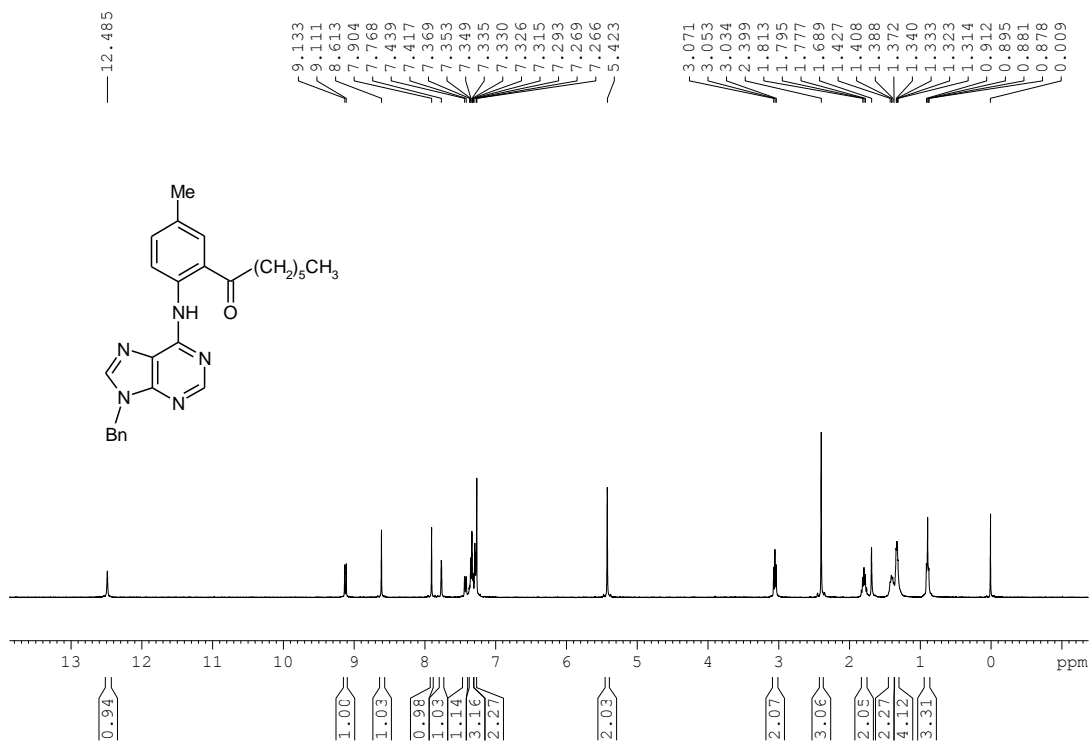

**Figure S4.**  $^1\text{H}$  NMR spectrum of compound **2b**

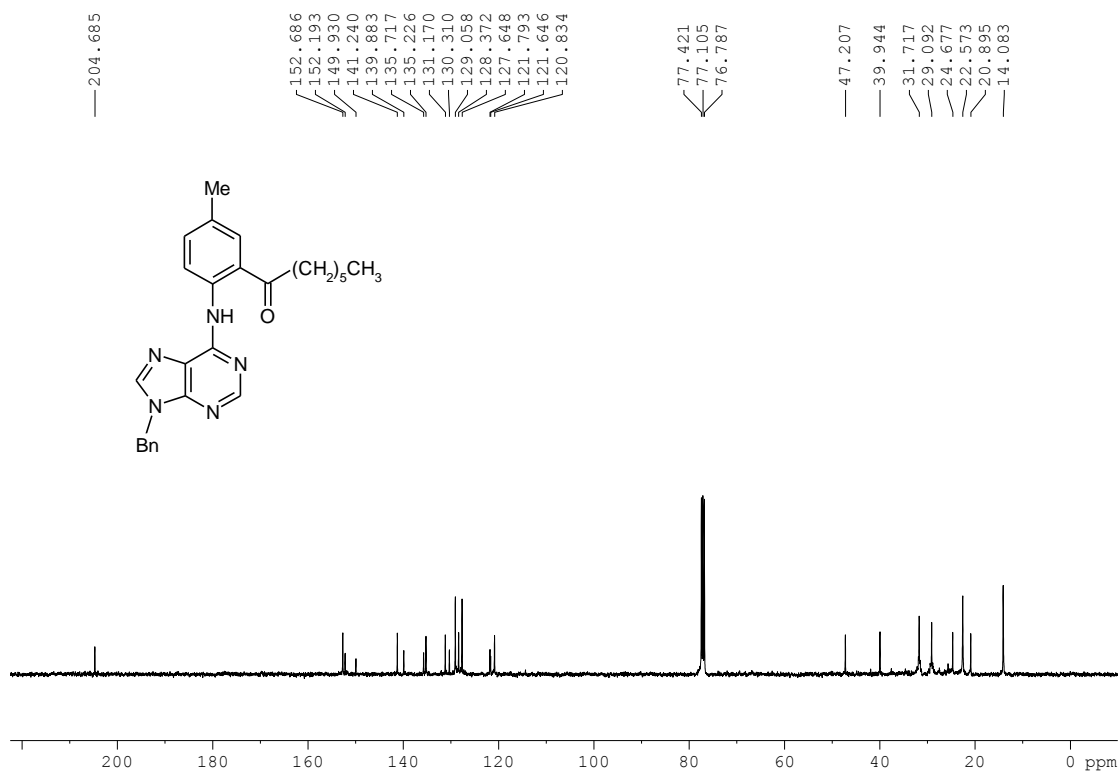

**Figure S5.**  $^{13}\text{C}$  NMR spectrum of compound **2b**

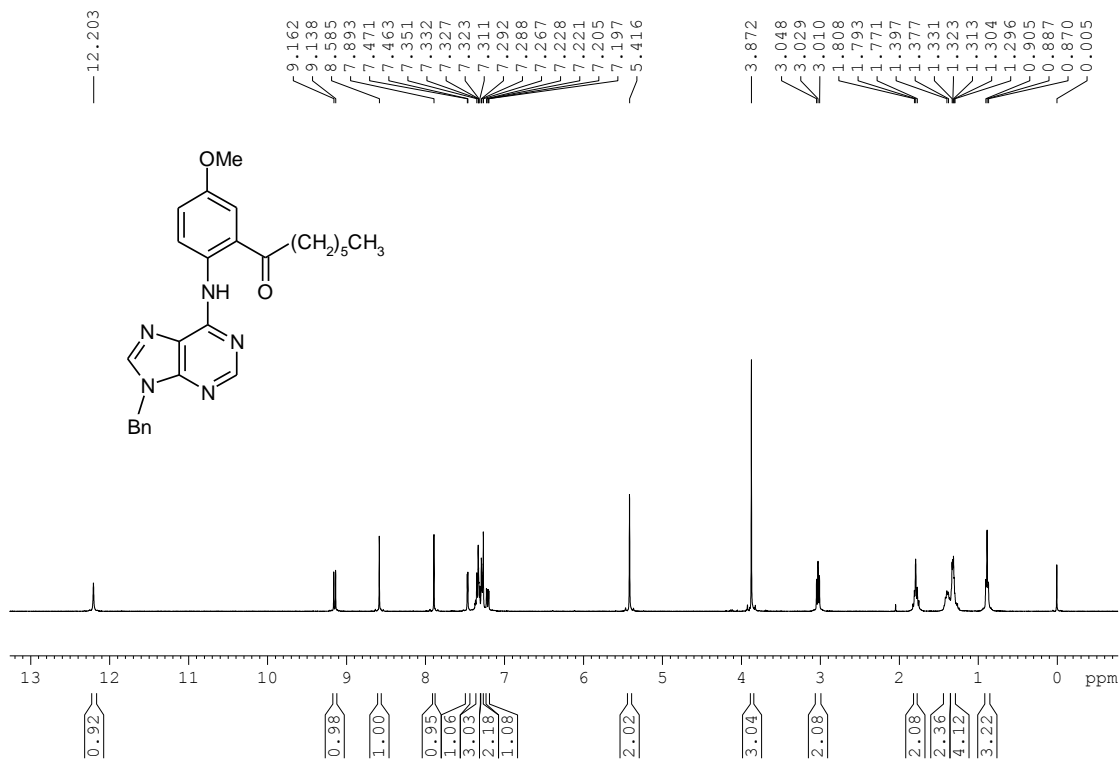

Figure S6. <sup>1</sup>H NMR spectrum of compound 2c

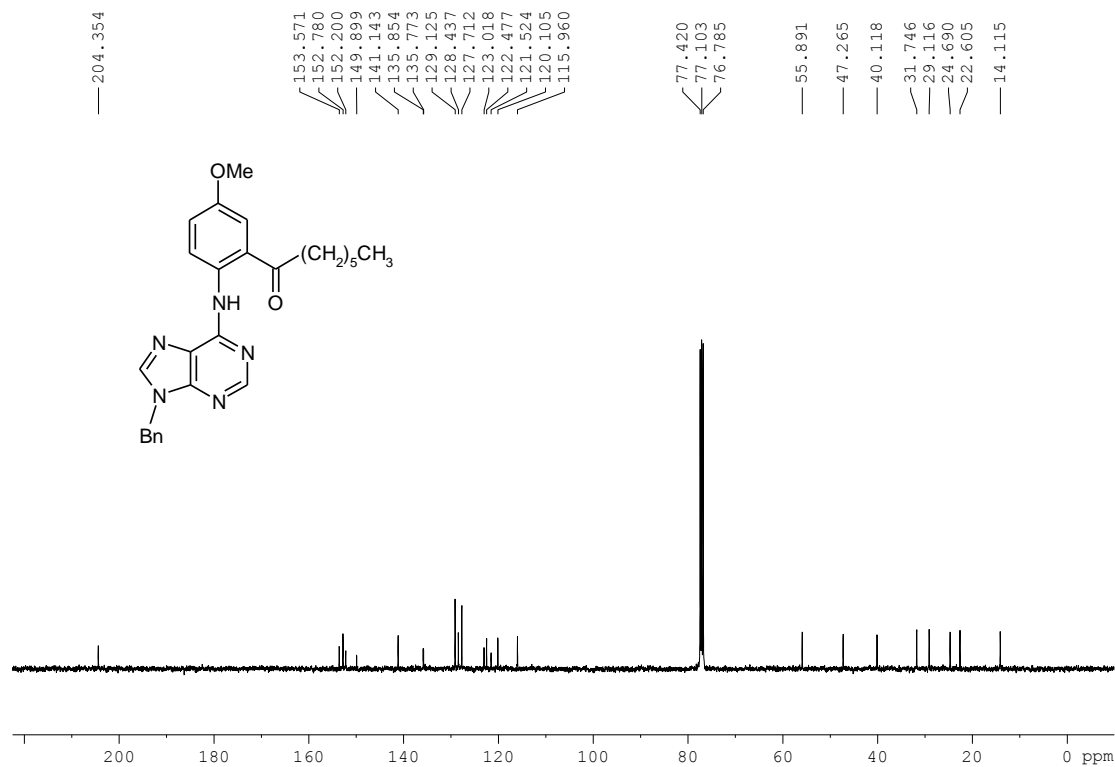

Figure S7. <sup>13</sup>C NMR spectrum of compound 2c

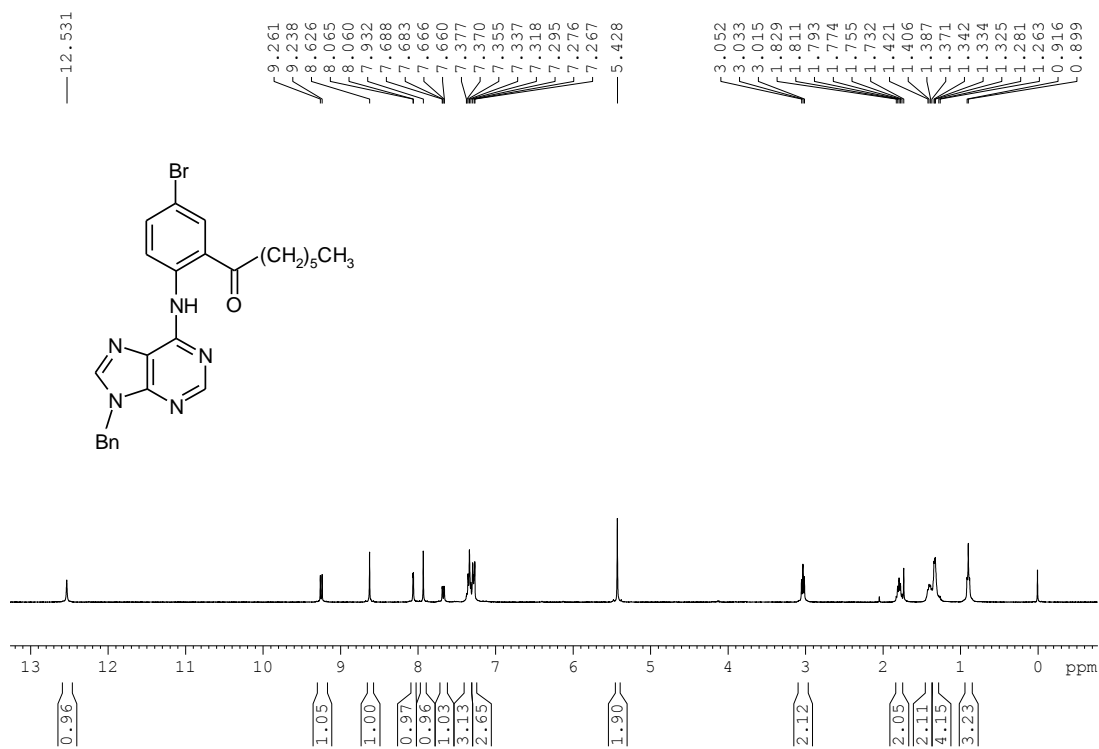

Figure S8. <sup>1</sup>H NMR spectrum of compound 2d

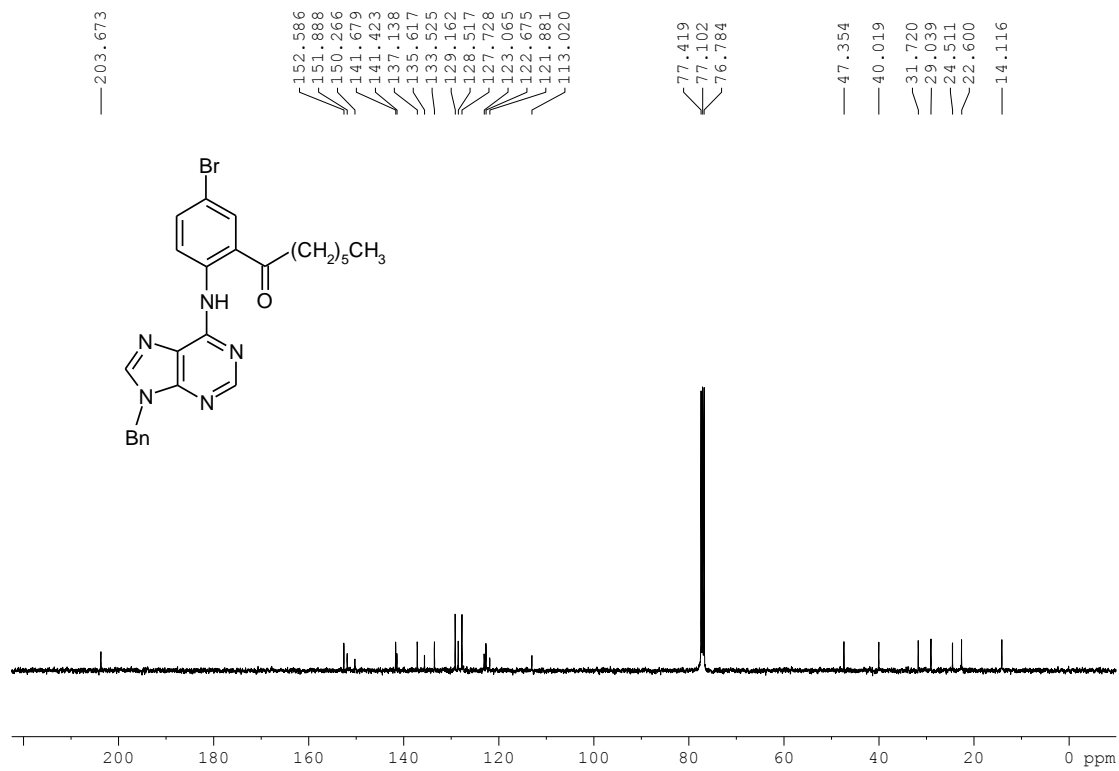

Figure S9. <sup>13</sup>C NMR spectrum of compound 2d

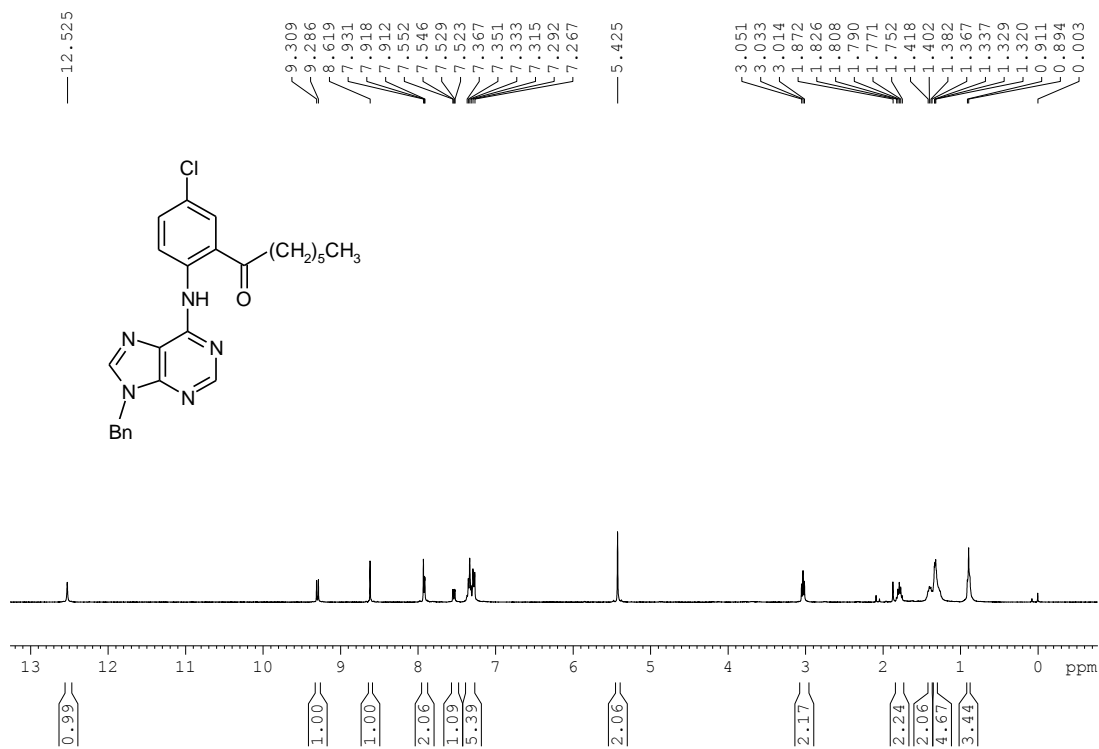

Figure S10.  $^1\text{H}$  NMR spectrum of compound **2e**

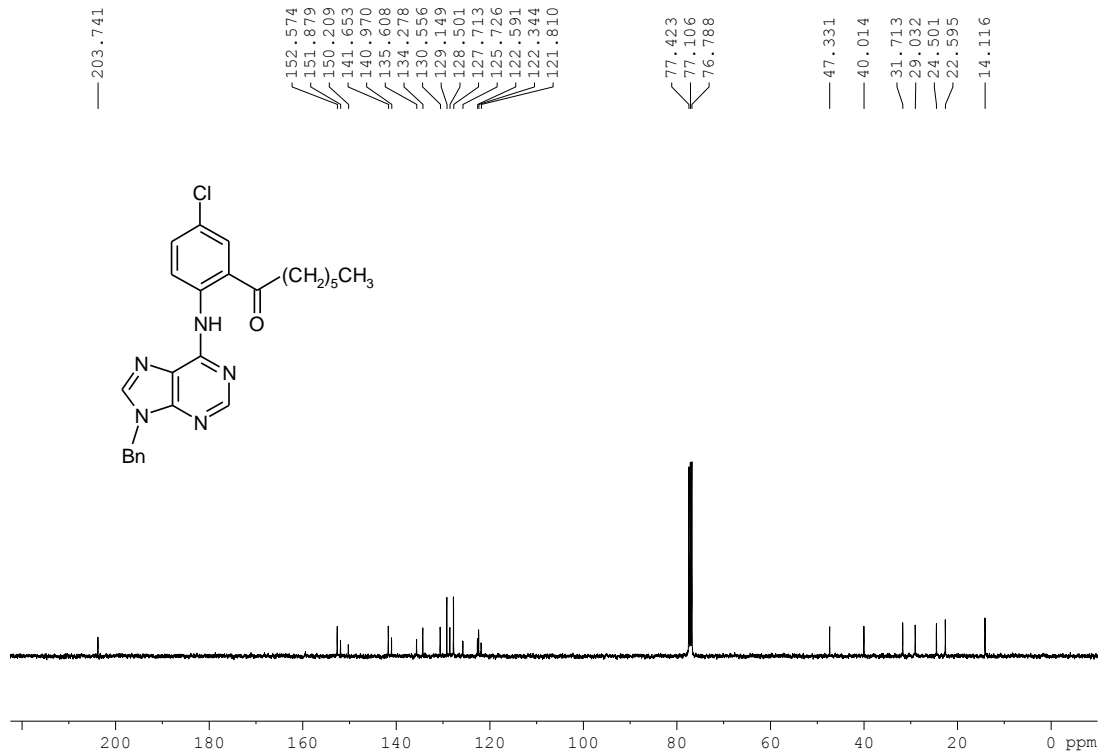

Figure S11.  $^{13}\text{C}$  NMR spectrum of compound **2e**

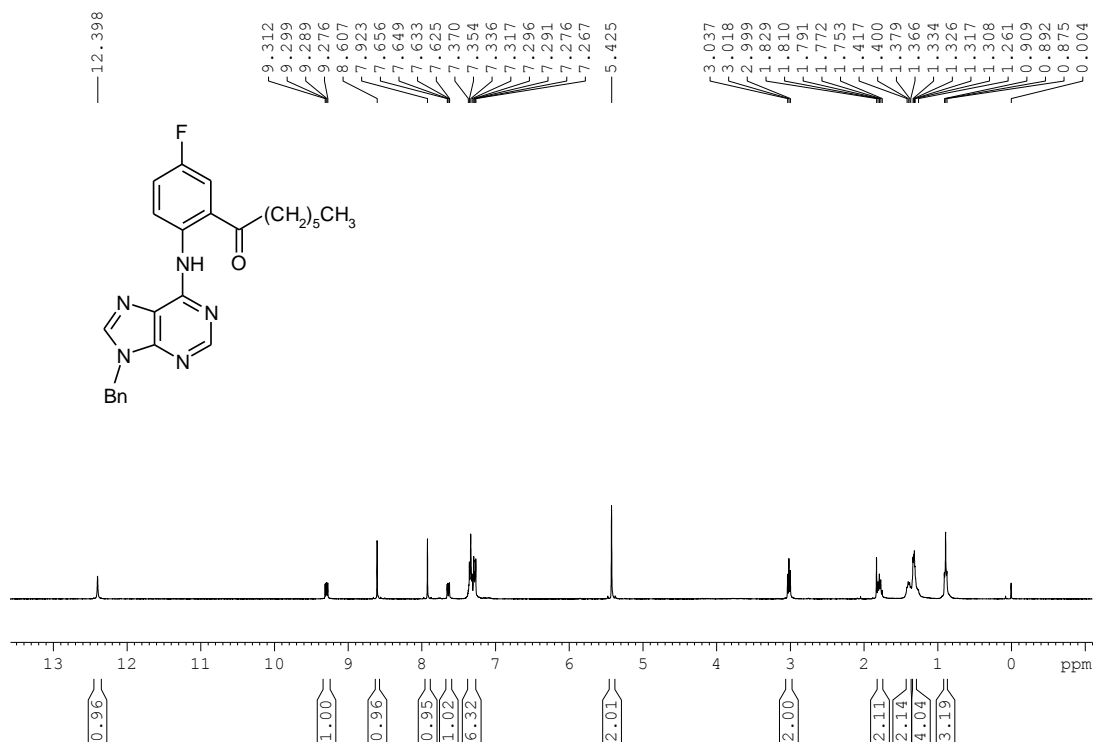

**Figure S12.** <sup>1</sup>H NMR spectrum of compound **2f**

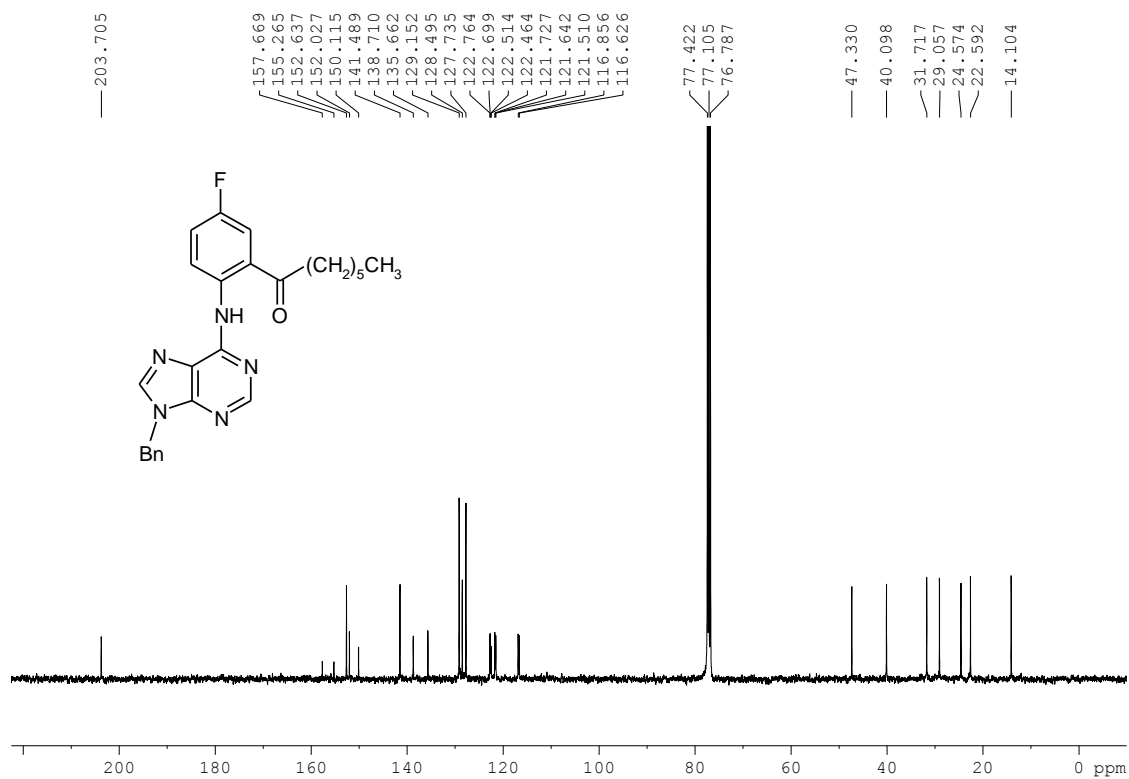

**Figure S13.** <sup>13</sup>C NMR spectrum of compound **2f**



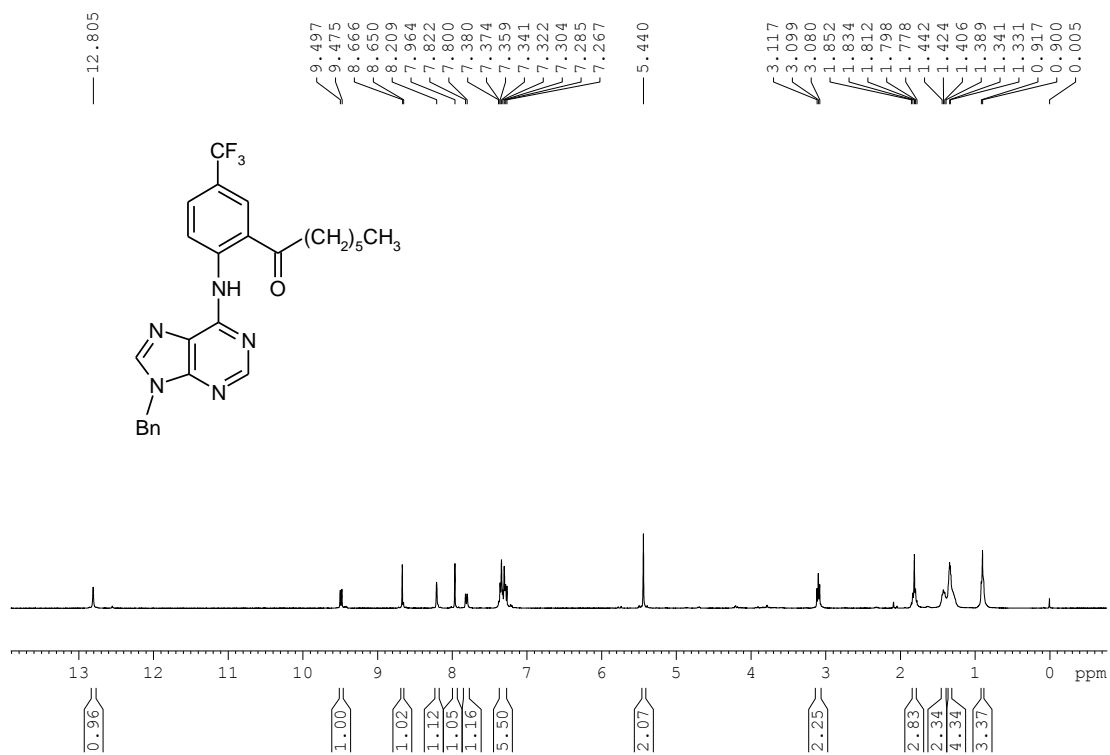

**Figure S14.** <sup>1</sup>H NMR spectrum of compound **2g**

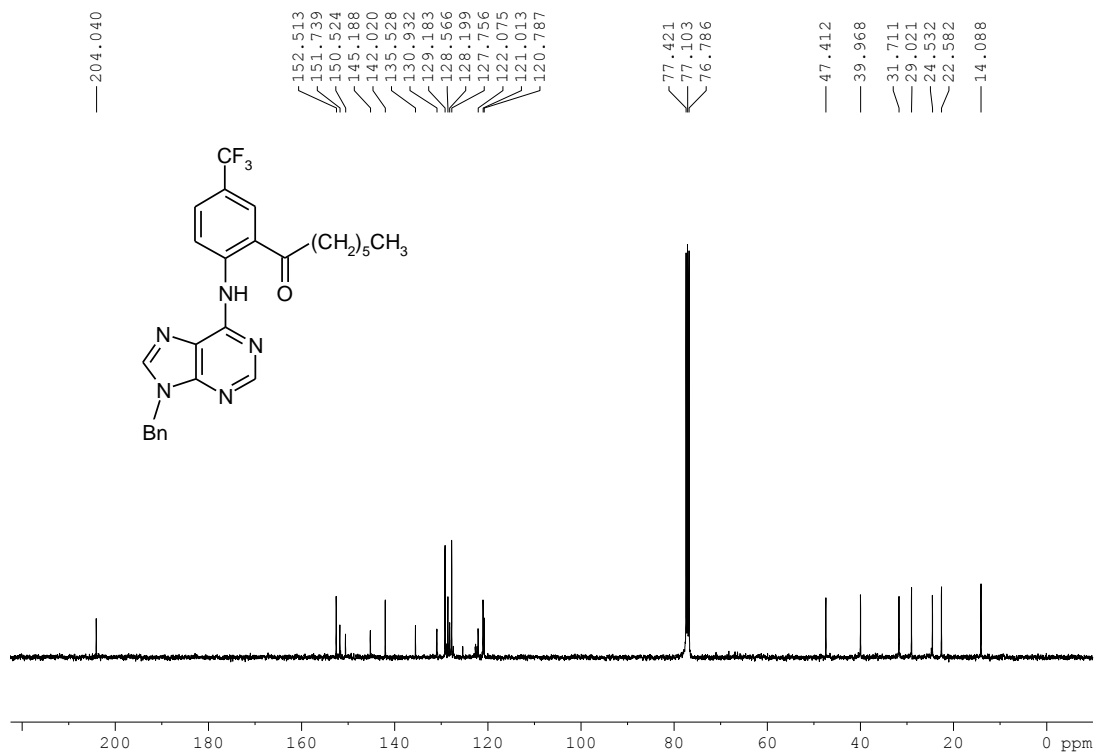

**Figure S15.** <sup>13</sup>C NMR spectrum of compound **2g**

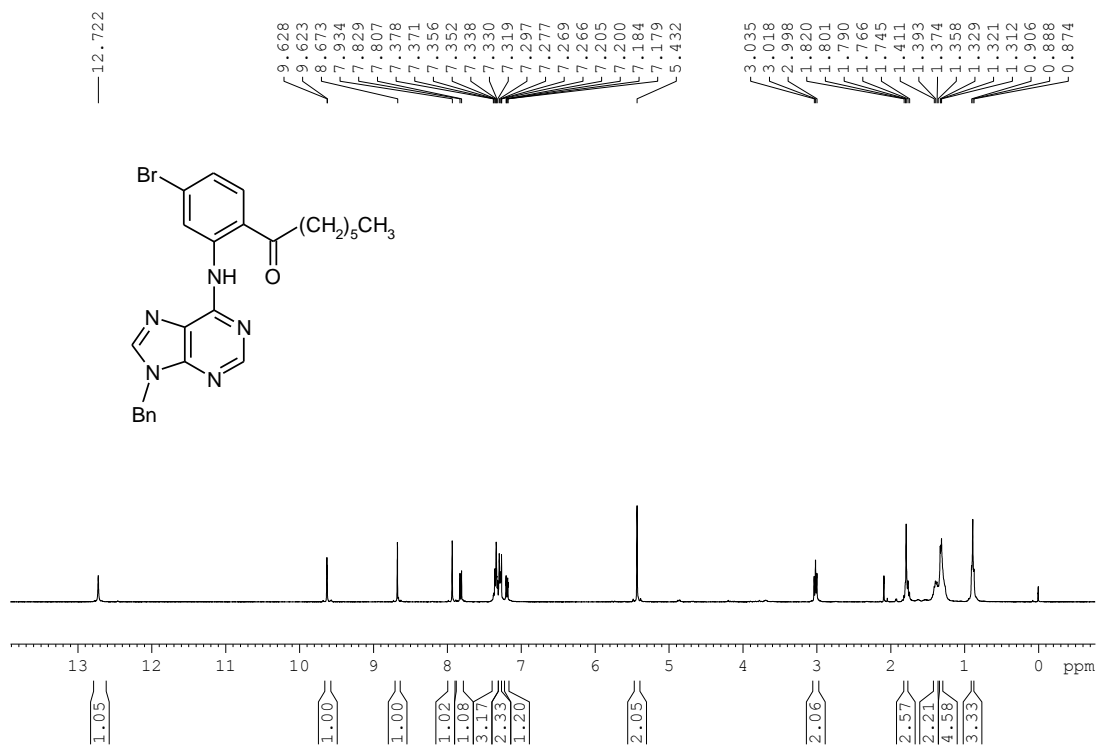

**Figure S16.**  $^1\text{H}$  NMR spectrum of compound **2h**

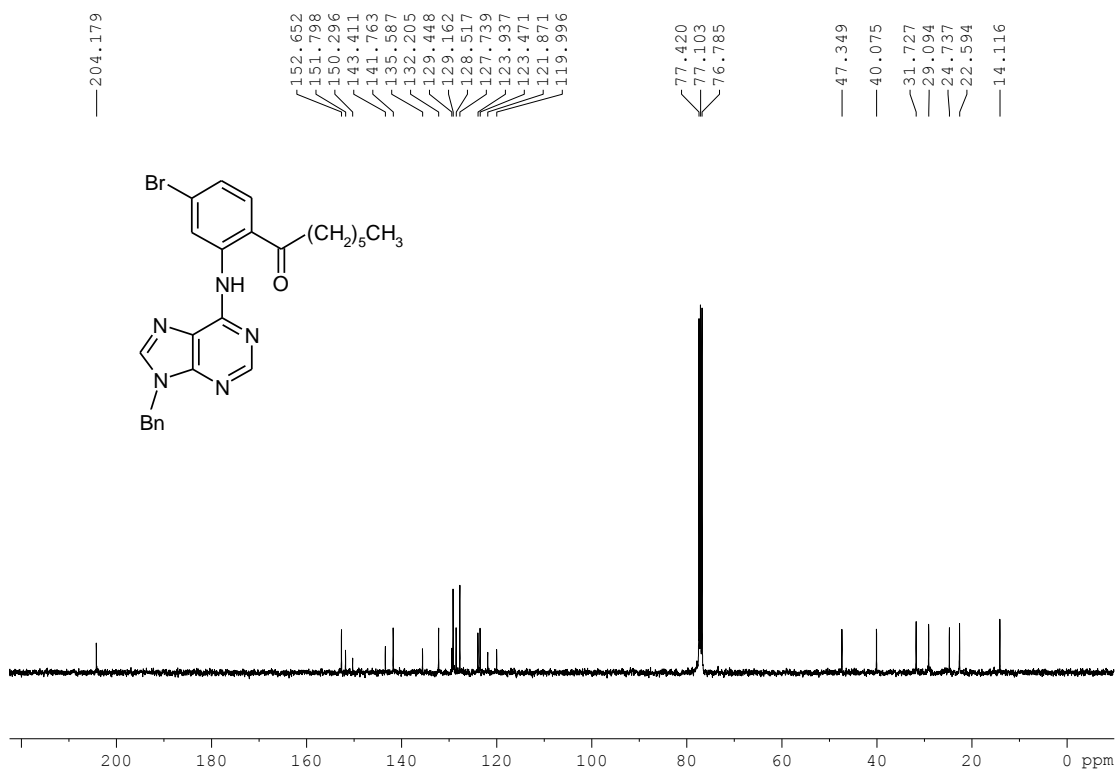

**Figure S17.**  $^{13}\text{C}$  NMR spectrum of compound **2h**

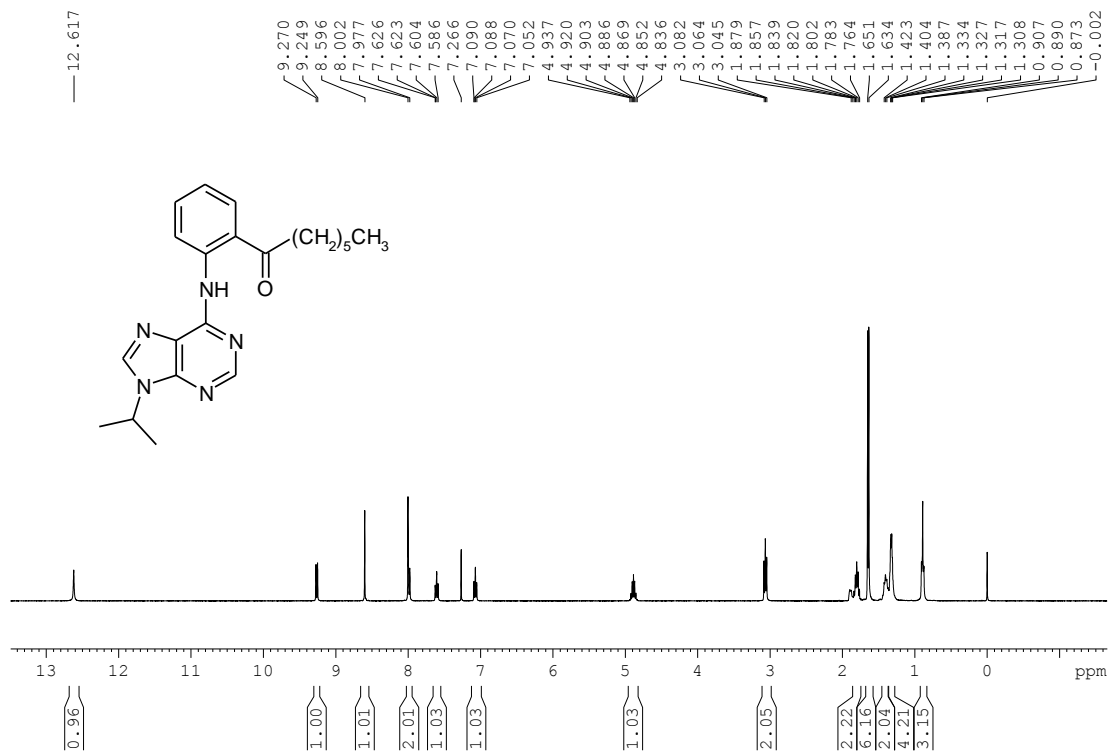

Figure S18. <sup>1</sup>H NMR spectrum of compound 2i

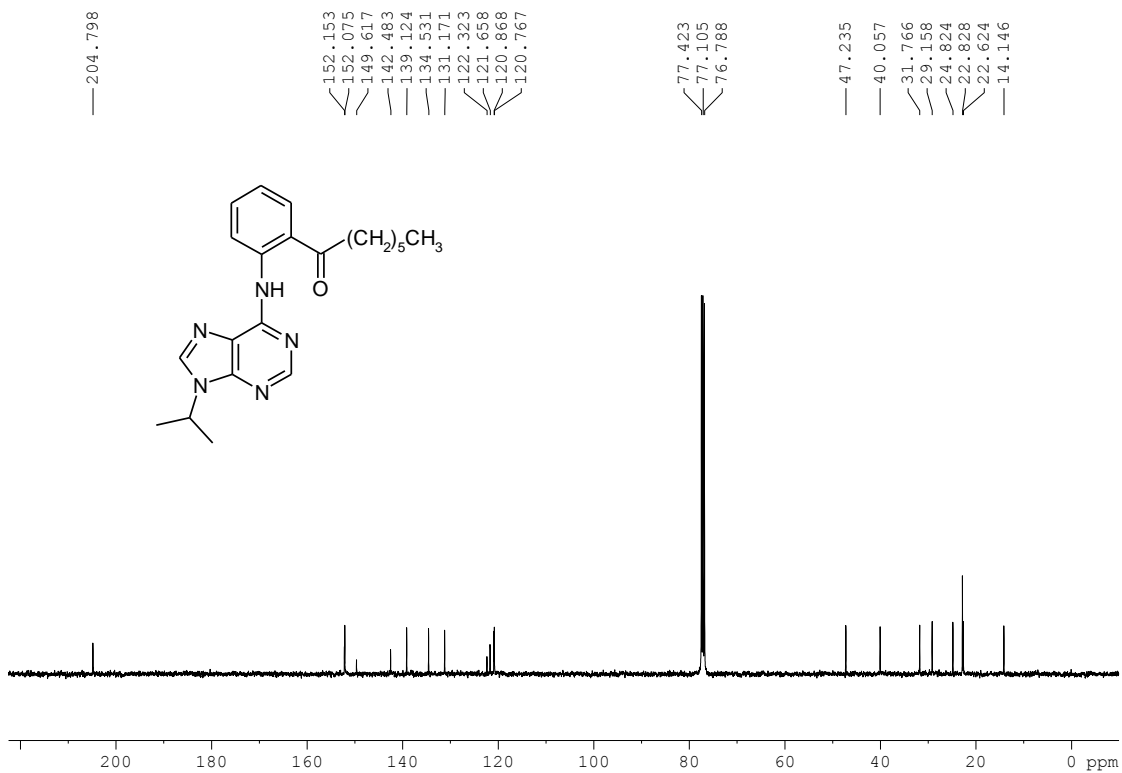

Figure S19. <sup>13</sup>C NMR spectrum of compound 2i

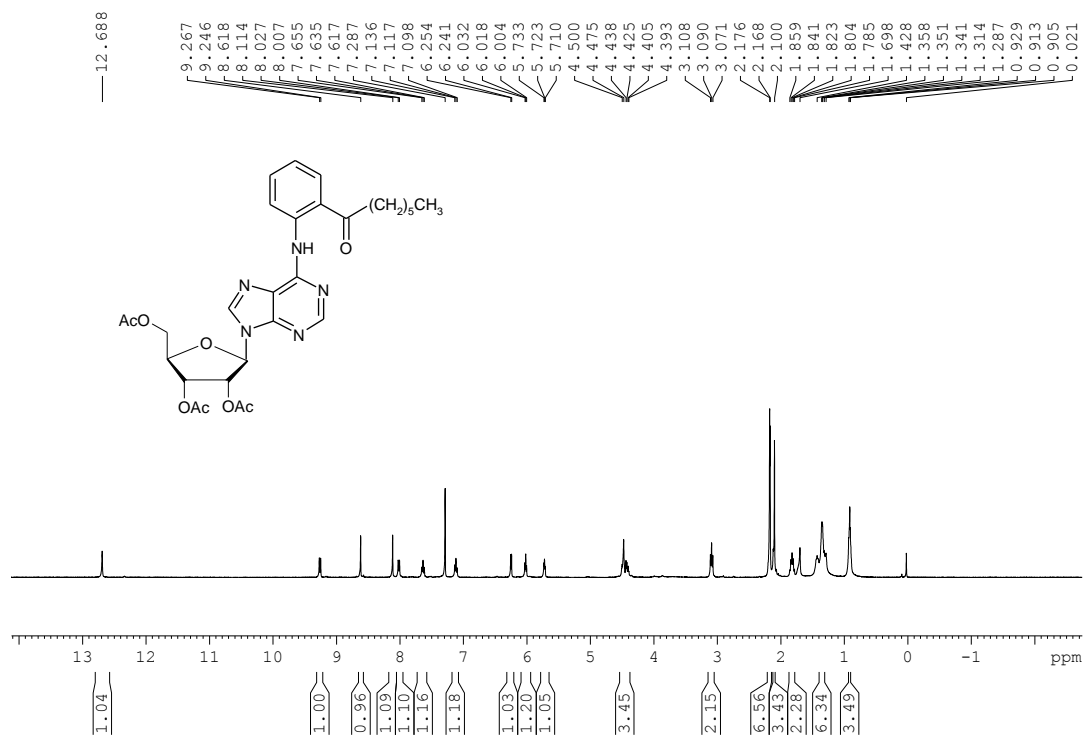

Figure S20. <sup>1</sup>H NMR spectrum of compound 2j

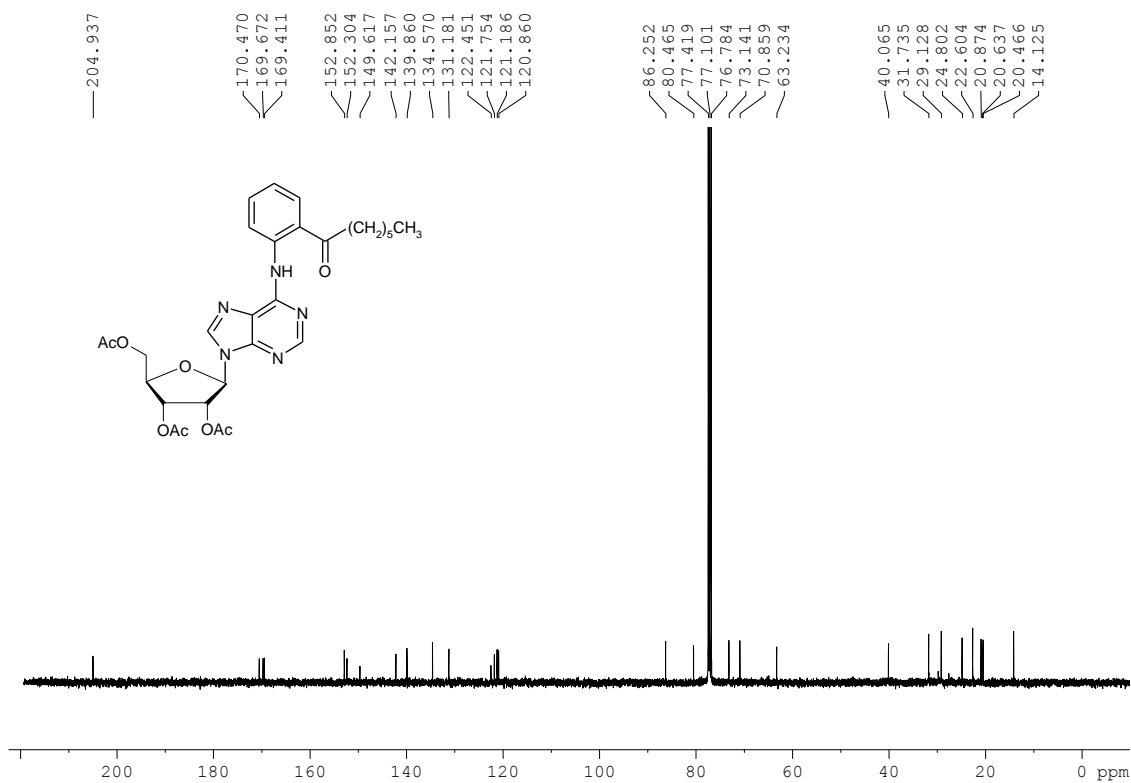

Figure S21. <sup>13</sup>C NMR spectrum of compound 2j

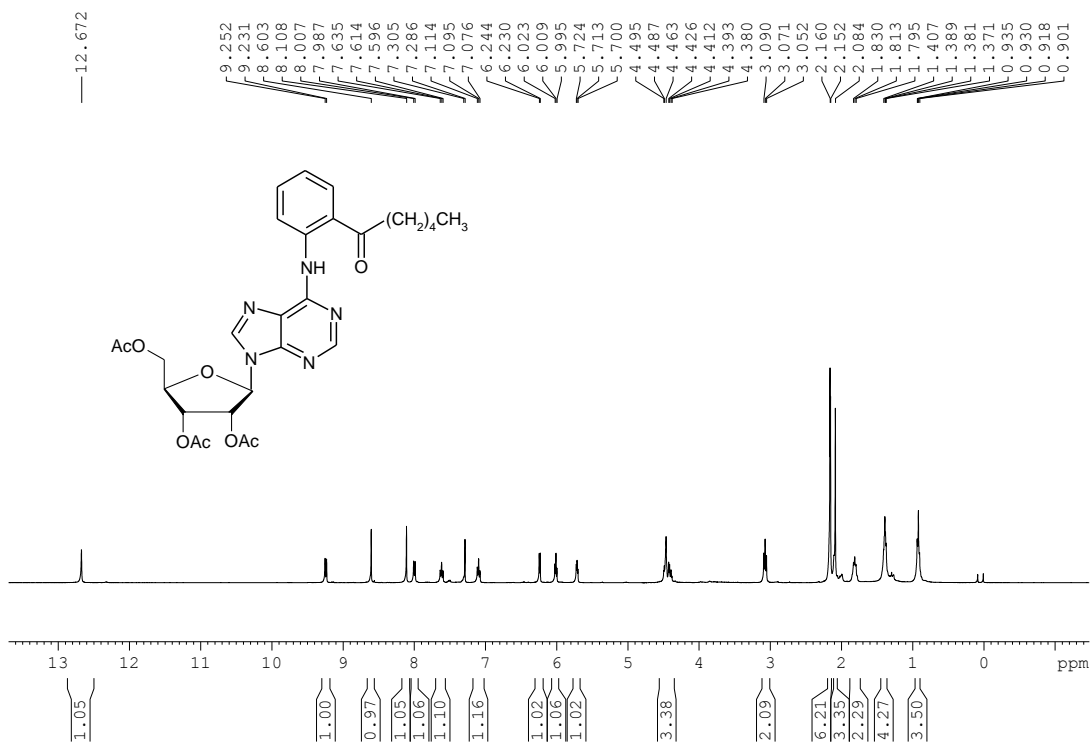

Figure S22. <sup>1</sup>H NMR spectrum of compound 2k

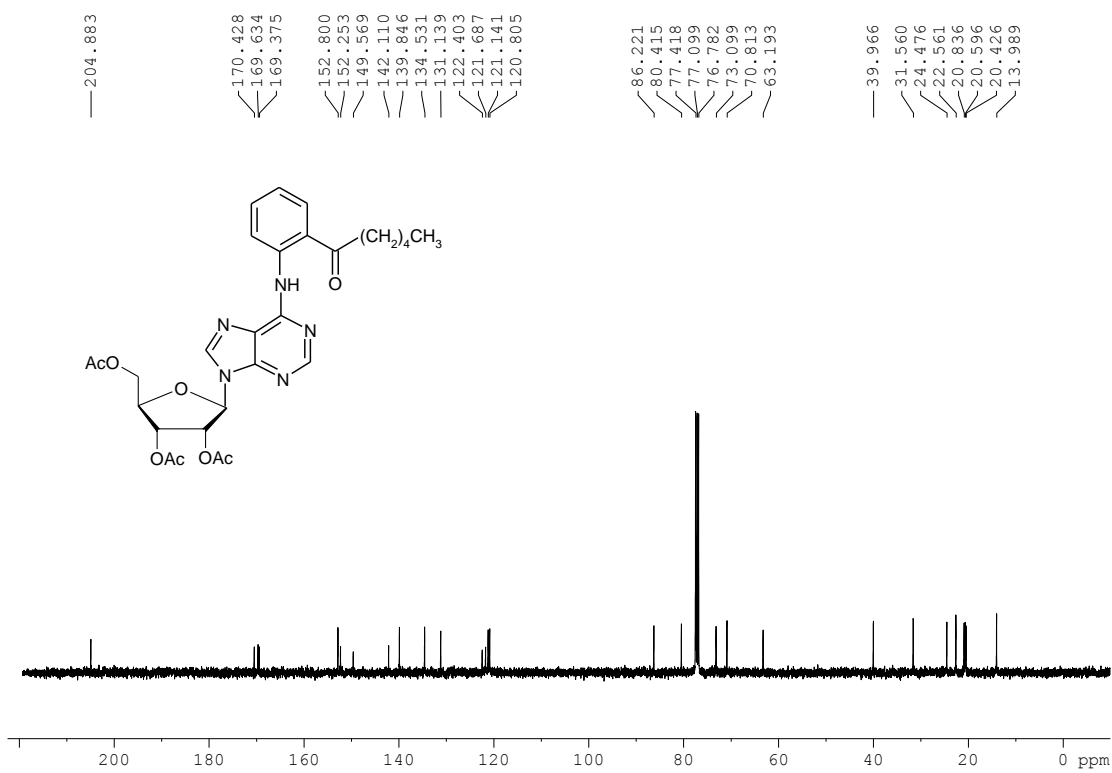

Figure S23. <sup>13</sup>C NMR spectrum of compound 2k

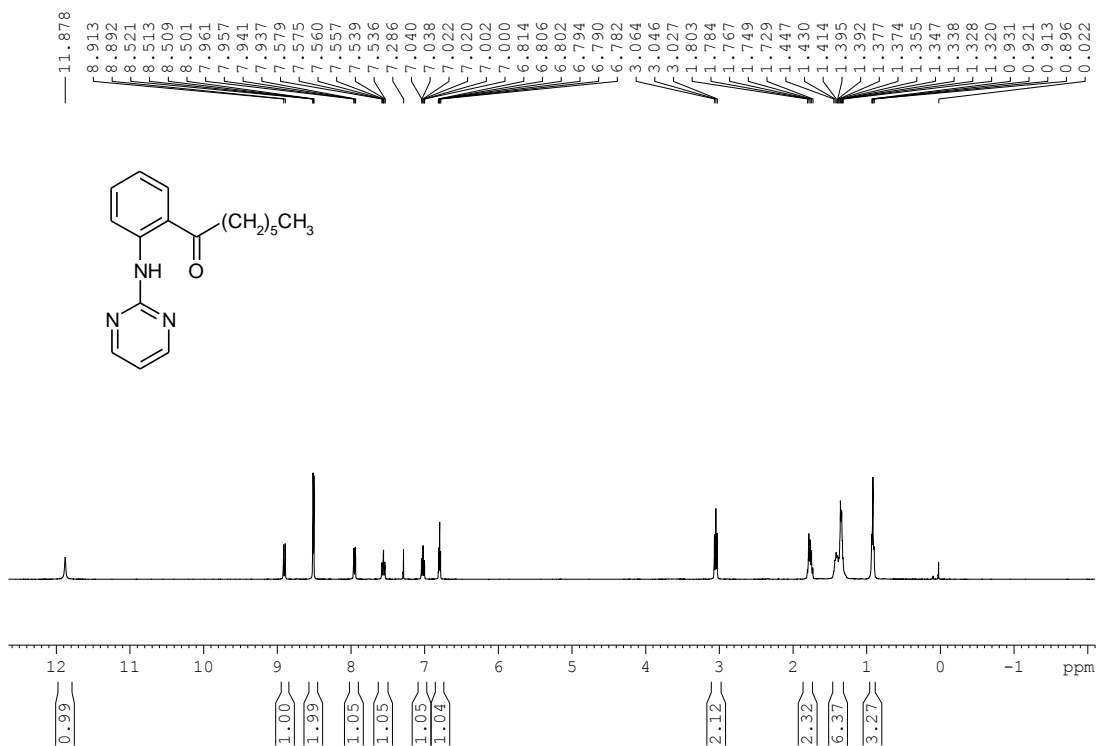

Figure S24. <sup>1</sup>H NMR spectrum of compound 21

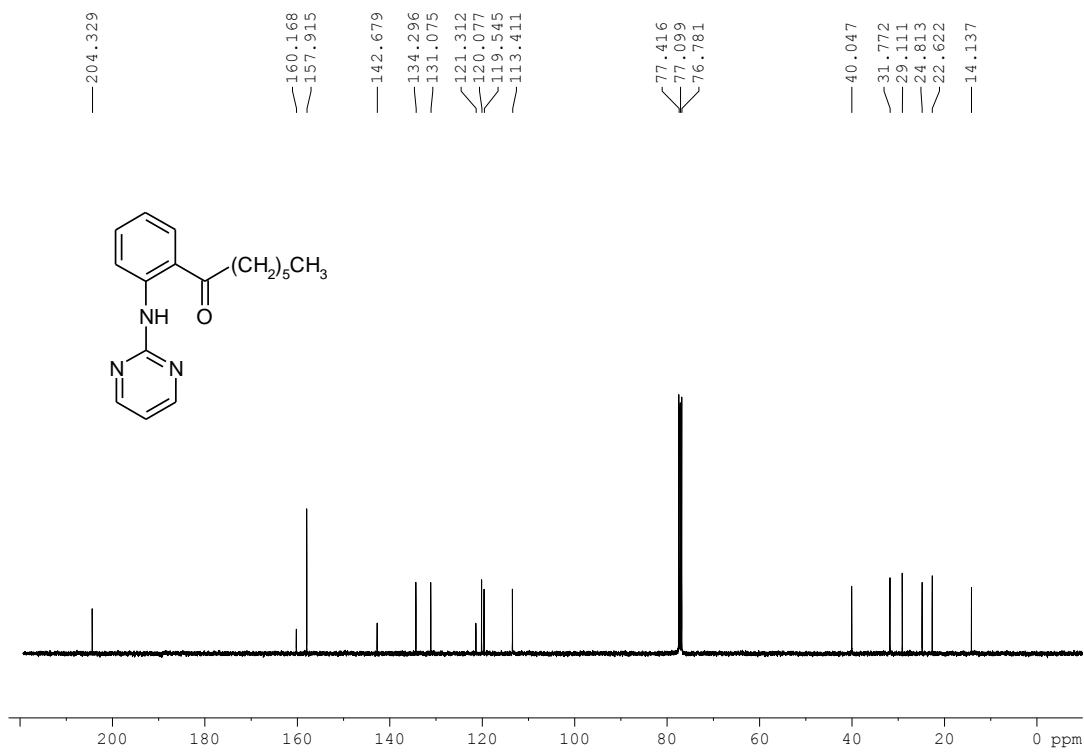

Figure S25. <sup>13</sup>C NMR spectrum of compound 21

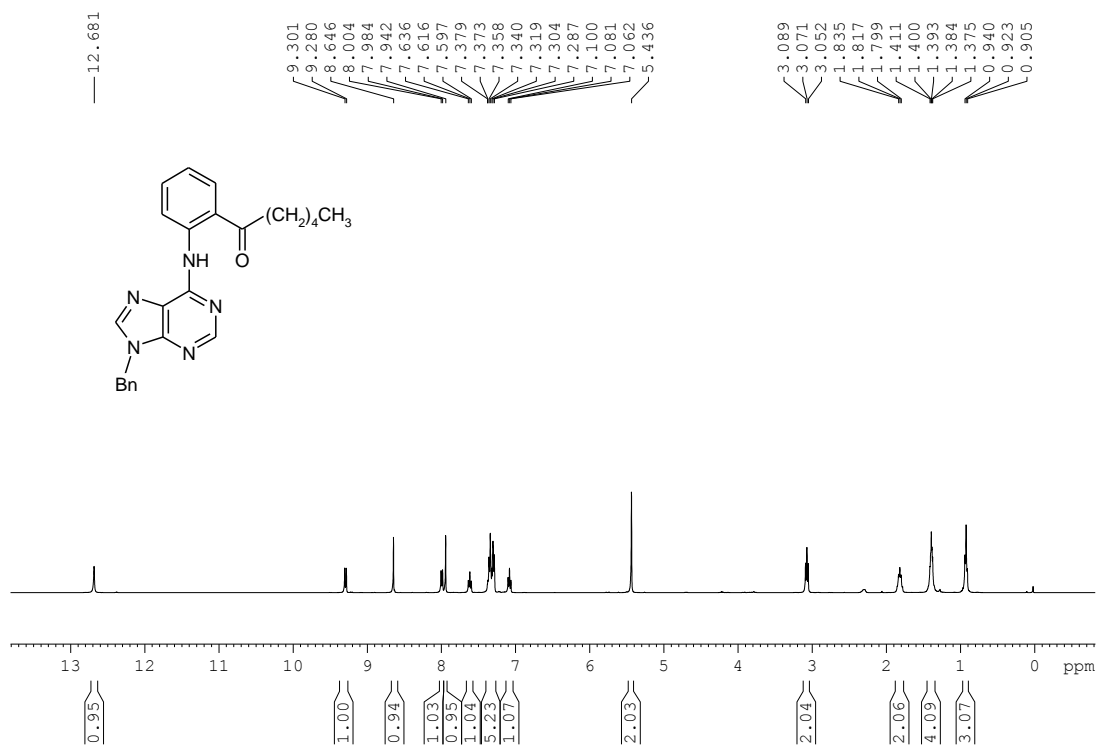

Figure S26.  $^1\text{H}$  NMR spectrum of compound **2m**

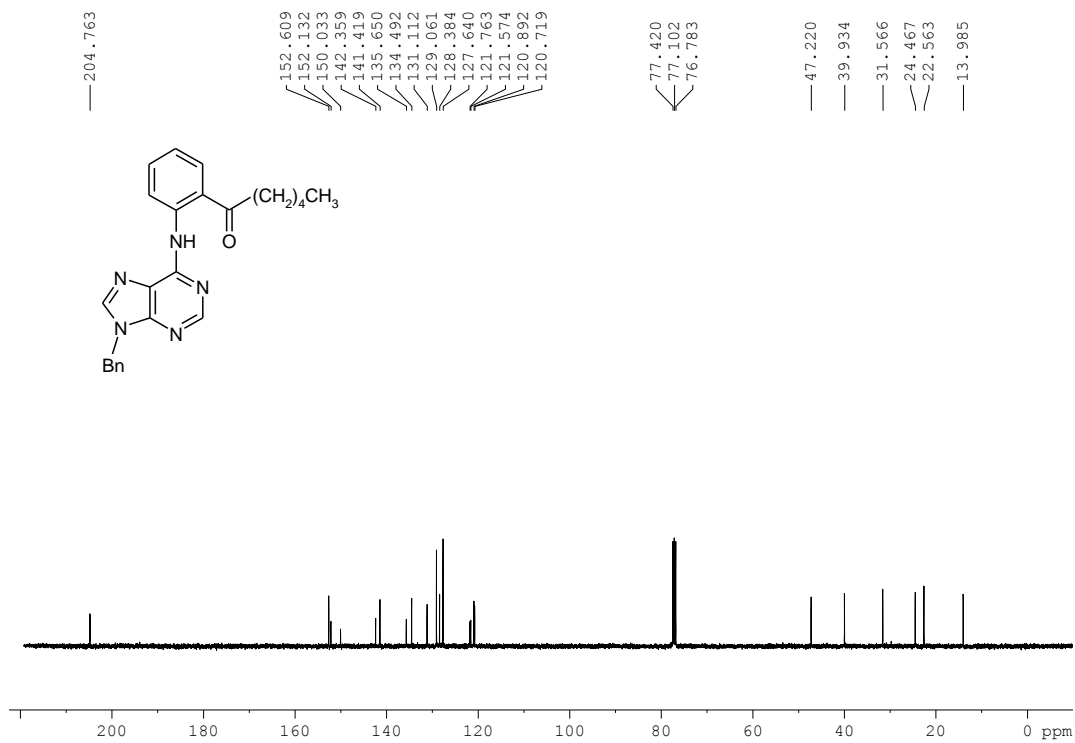

Figure S27.  $^{13}\text{C}$  NMR spectrum of compound **2m**

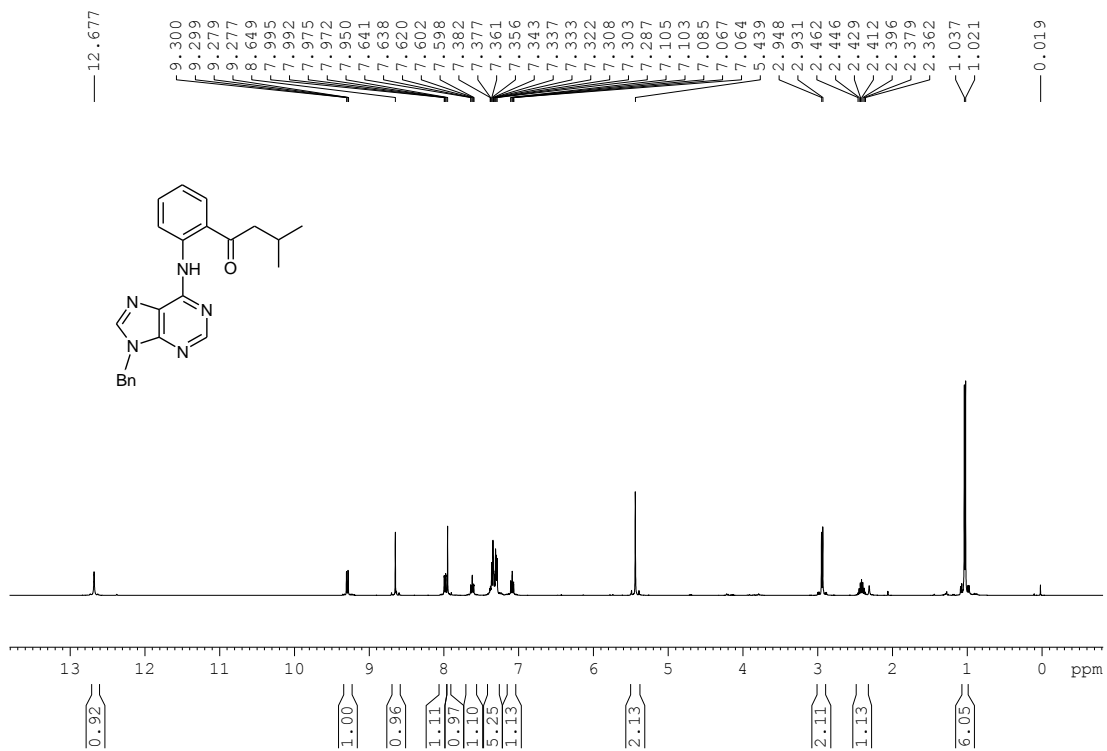

**Figure S28.**  $^1\text{H}$  NMR spectrum of compound **2n**

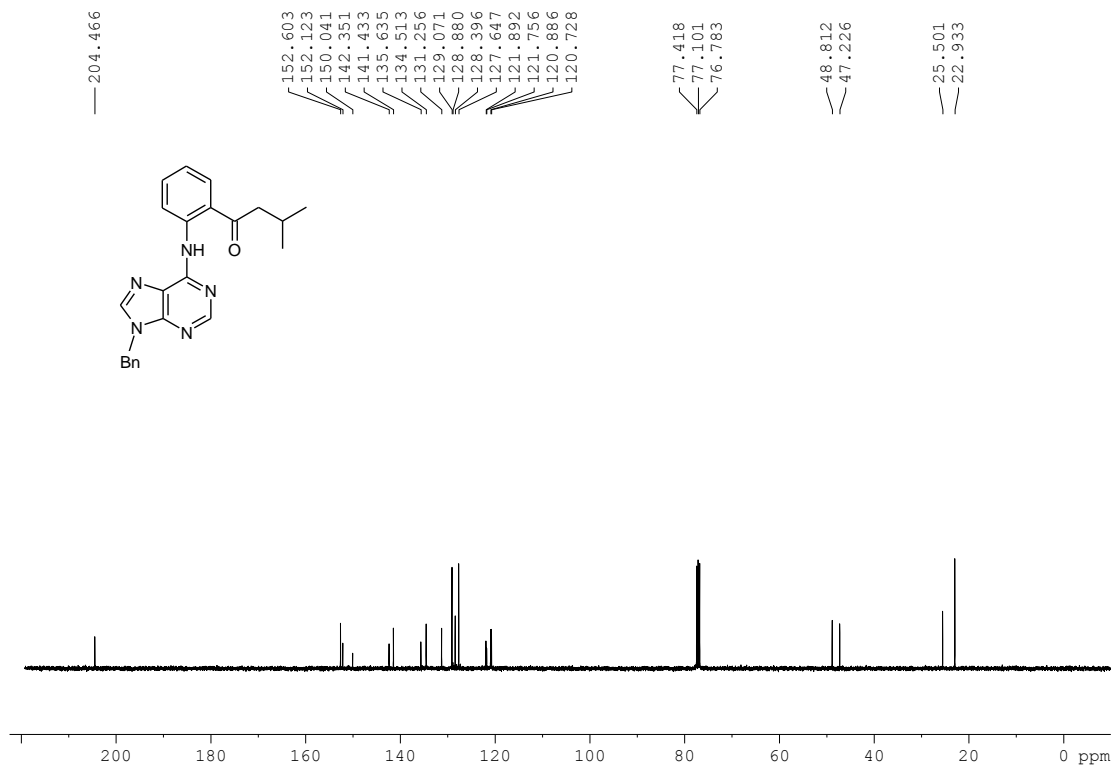

**Figure S29.**  $^{13}\text{C}$  NMR spectrum of compound **2n**



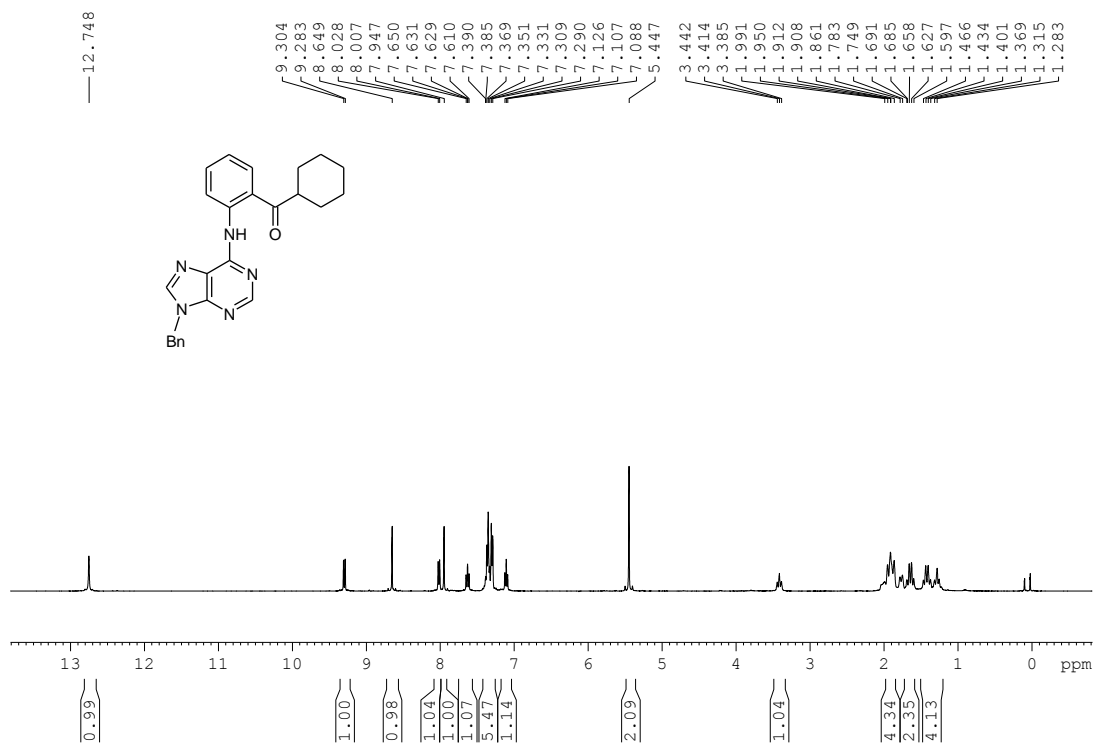

**Figure S30.** <sup>1</sup>H NMR spectrum of compound **2o**

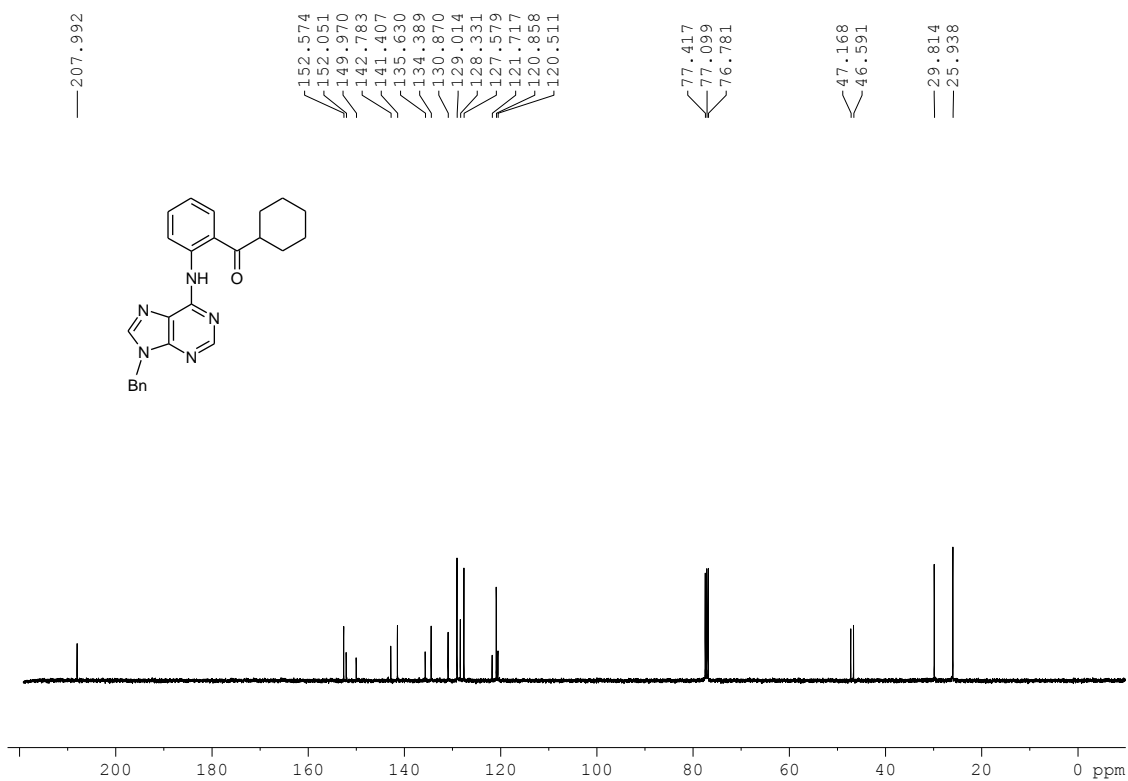

**Figure S31.** <sup>13</sup>C NMR spectrum of compound **2o**

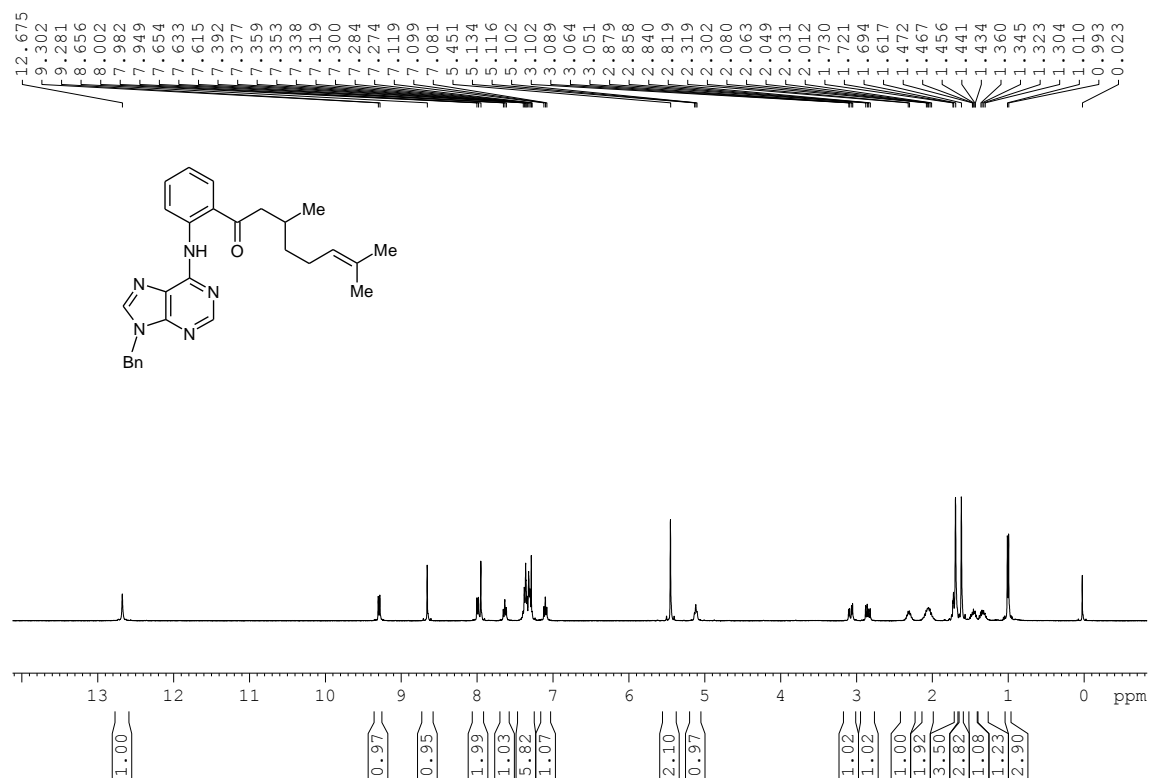

Figure S32. <sup>1</sup>H NMR spectrum of compound 2p

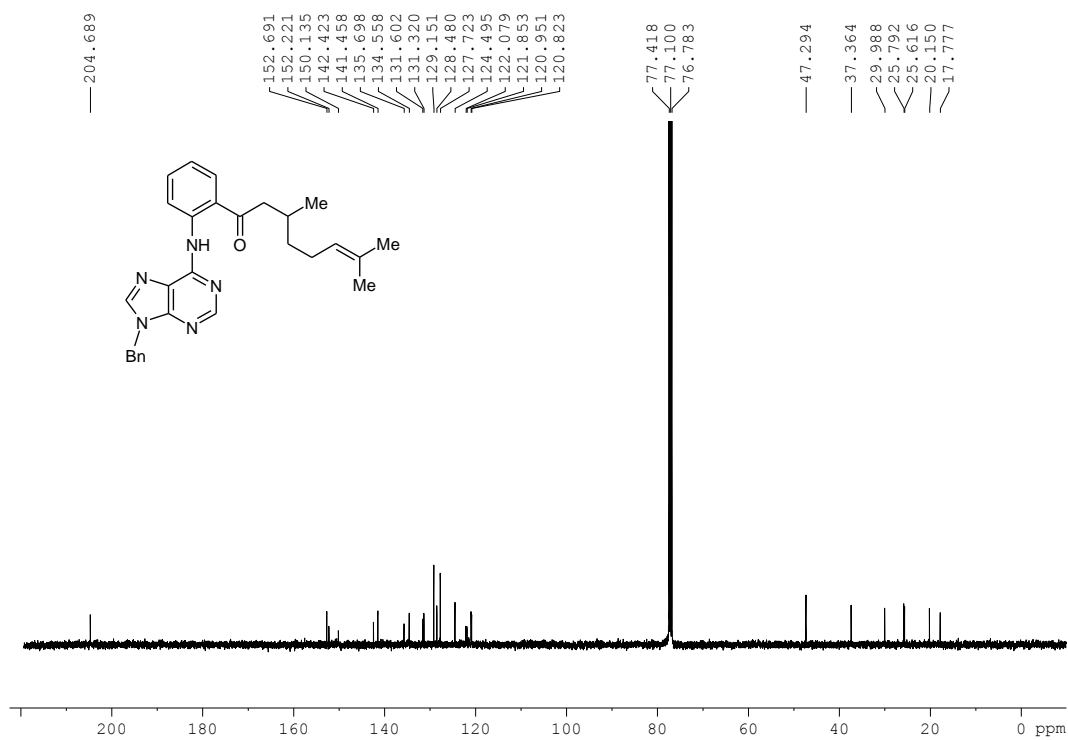

Figure S33. <sup>13</sup>C NMR spectrum of compound 2p

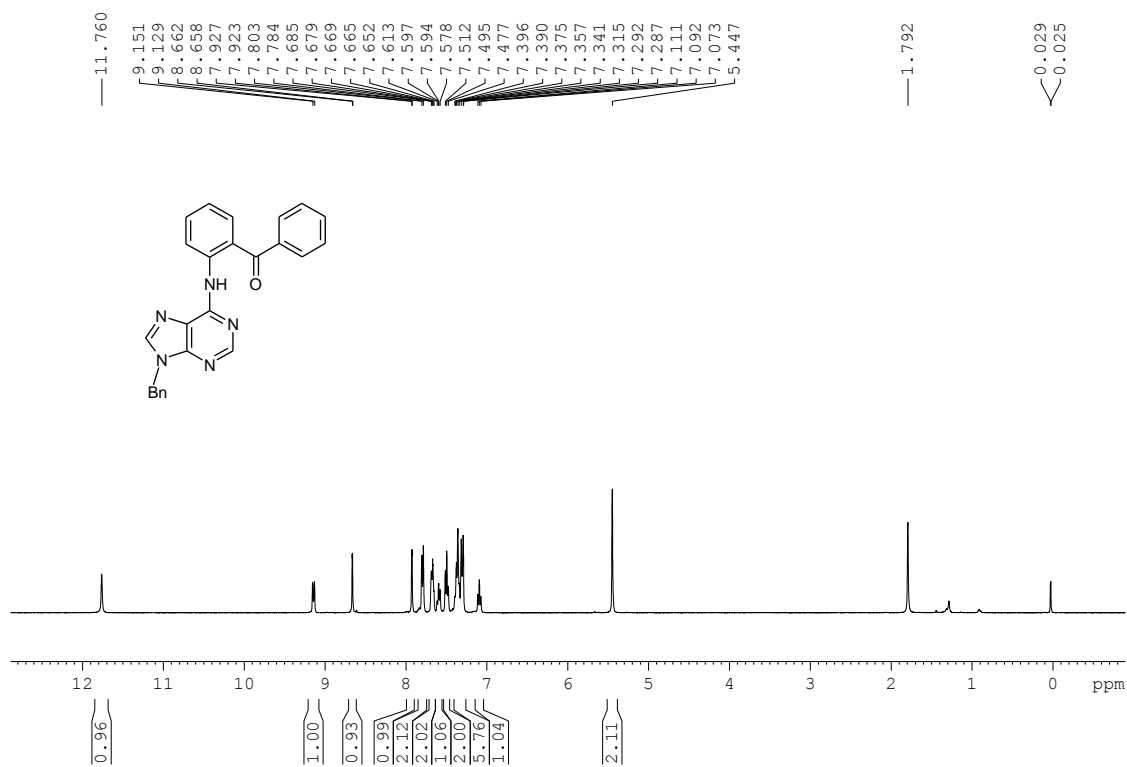

Figure S34.  $^1\text{H}$  NMR spectrum of compound 3a

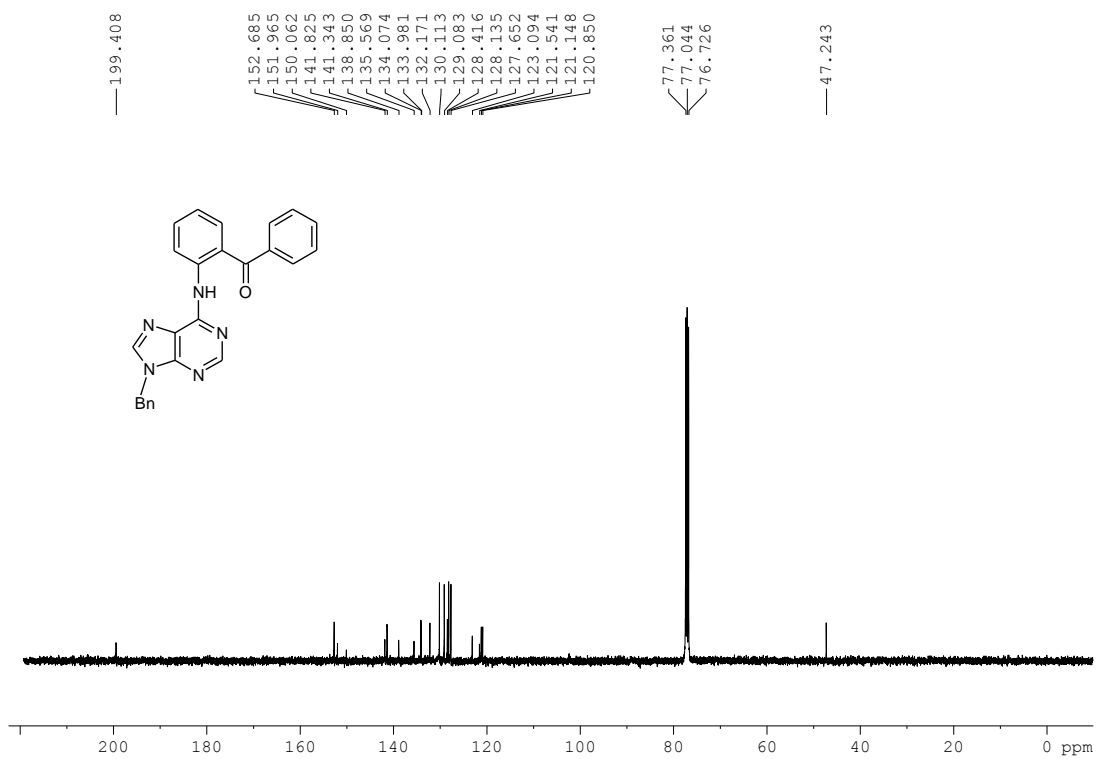

Figure S35.  $^{13}\text{C}$  NMR spectrum of compound 3a

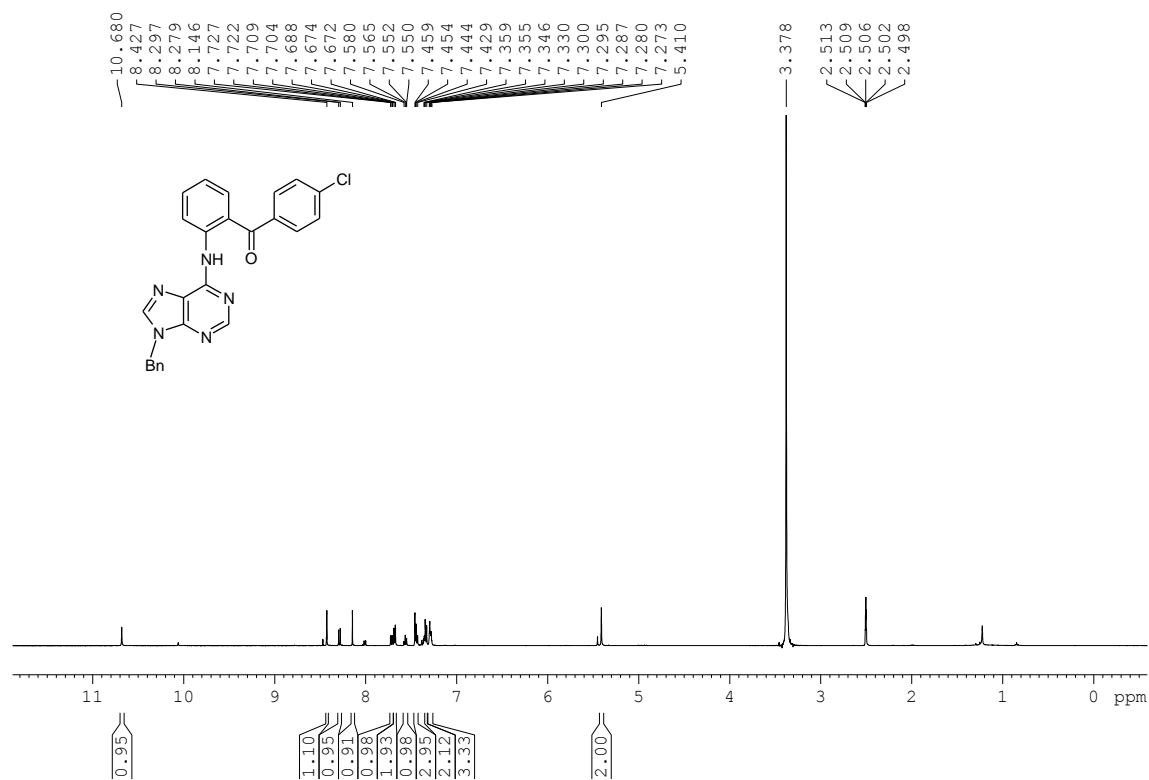

**Figure S38.** <sup>1</sup>H NMR spectrum of compound **3b**

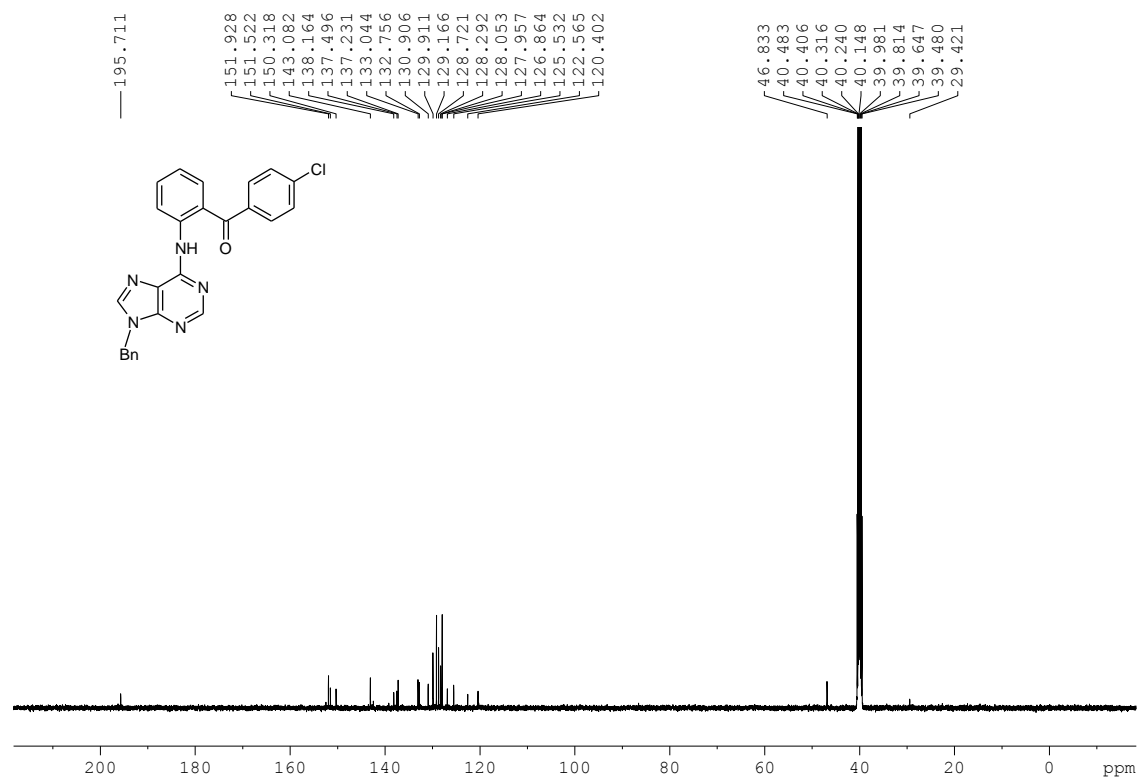

**Figure S39.** <sup>13</sup>C NMR spectrum of compound **3b**

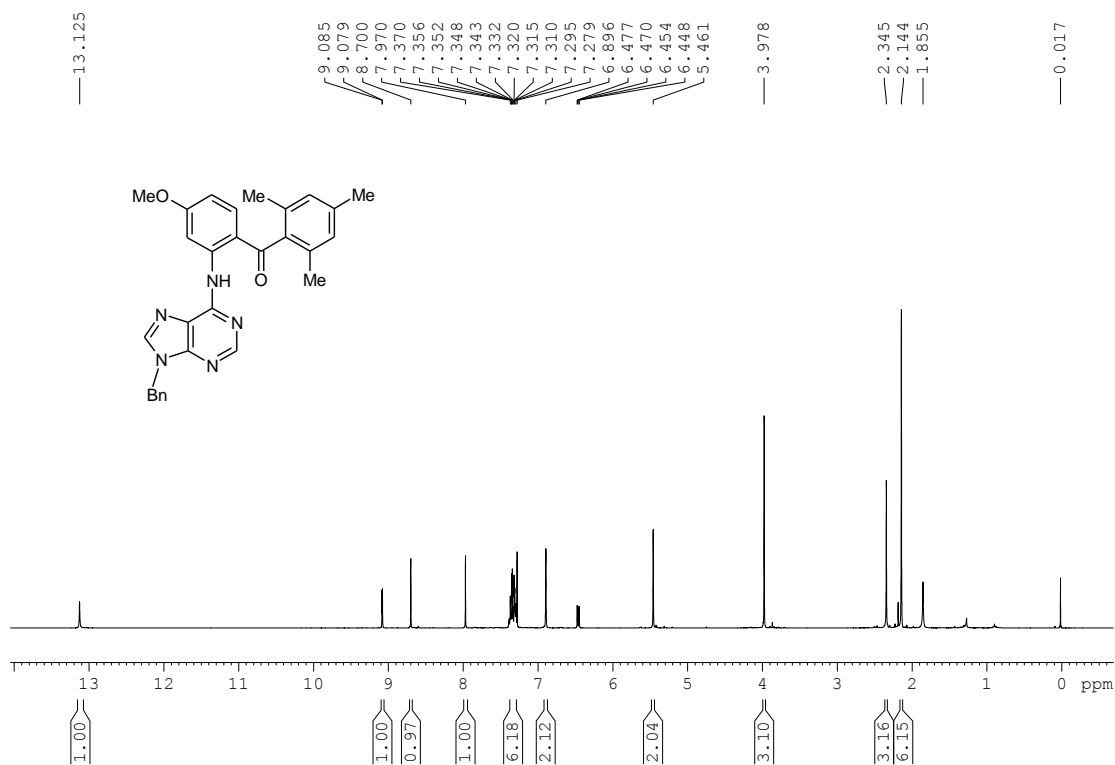

Figure S40. <sup>1</sup>H NMR spectrum of compound 3c

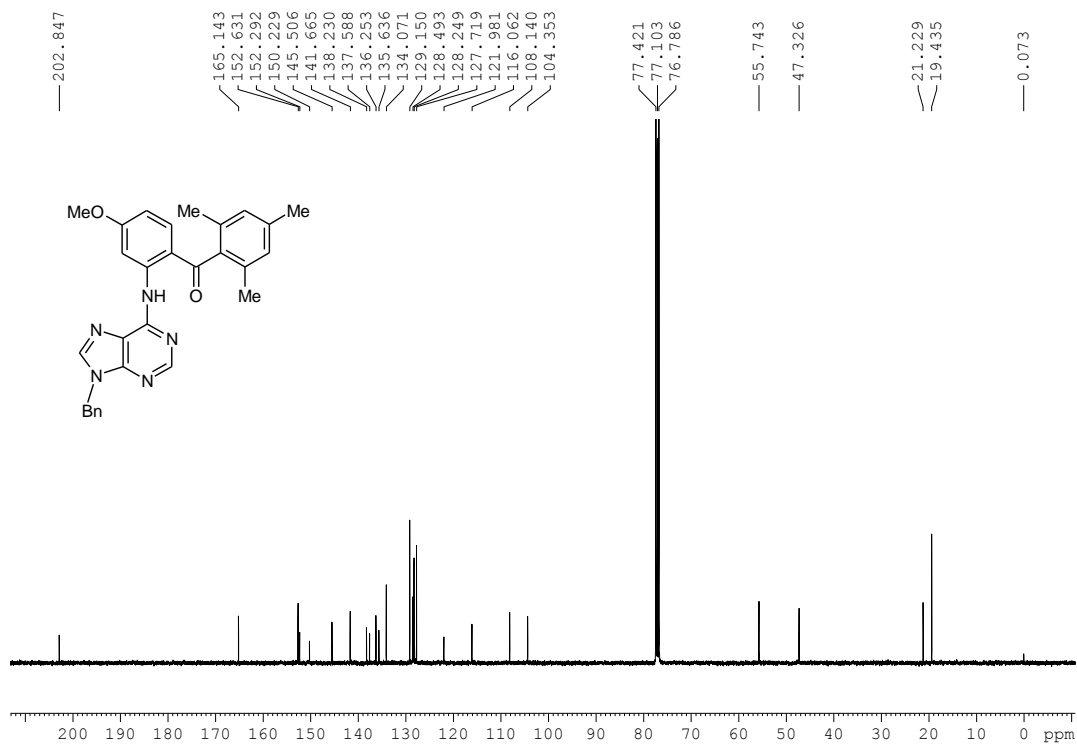

Figure S41. <sup>13</sup>C NMR spectrum of compound 3c

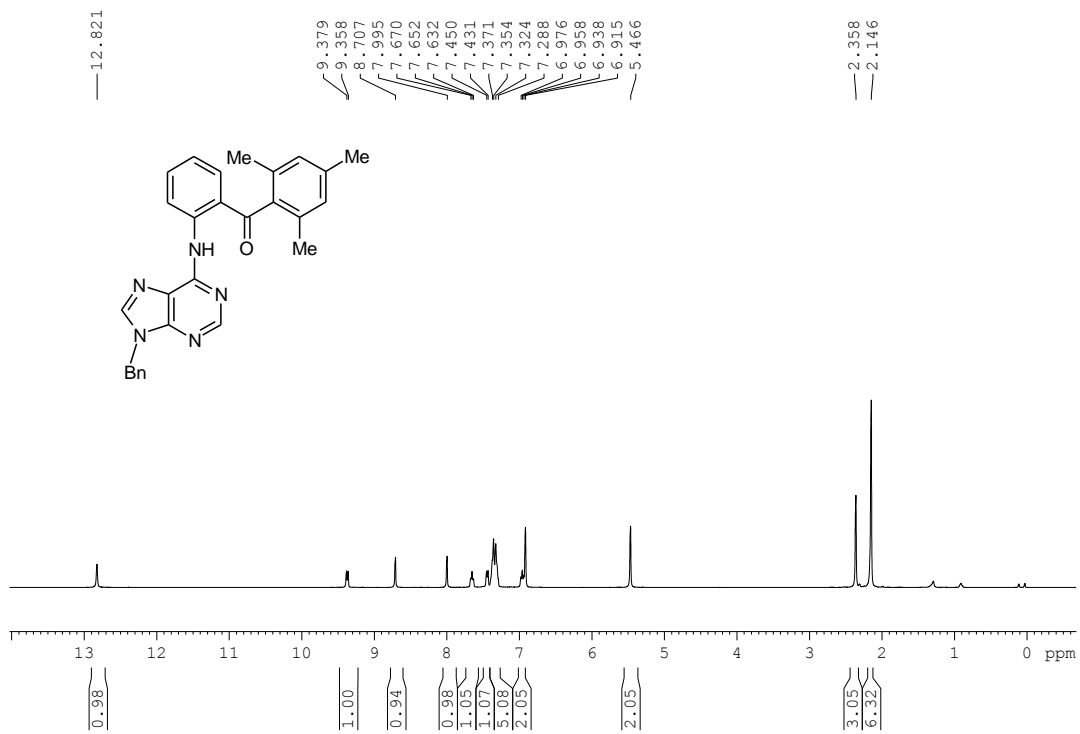

Figure S36.  $^1\text{H NMR}$  spectrum of compound 3d

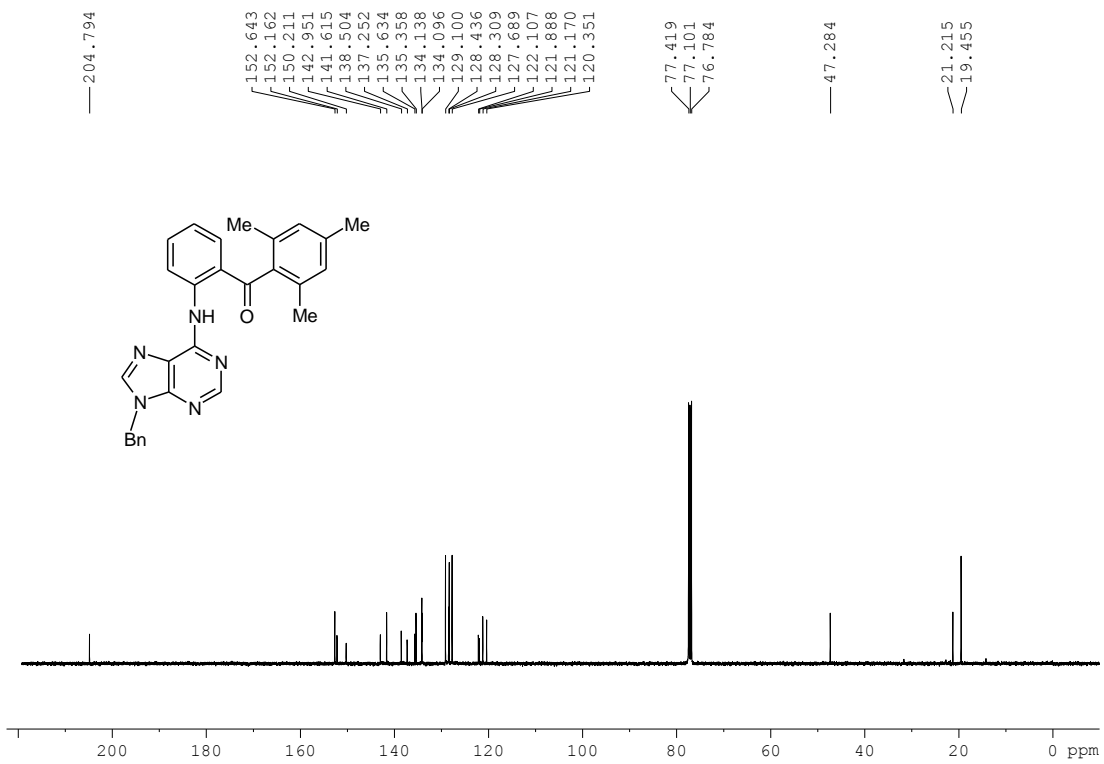

Figure S37.  $^{13}\text{C NMR}$  spectrum of compound 3d

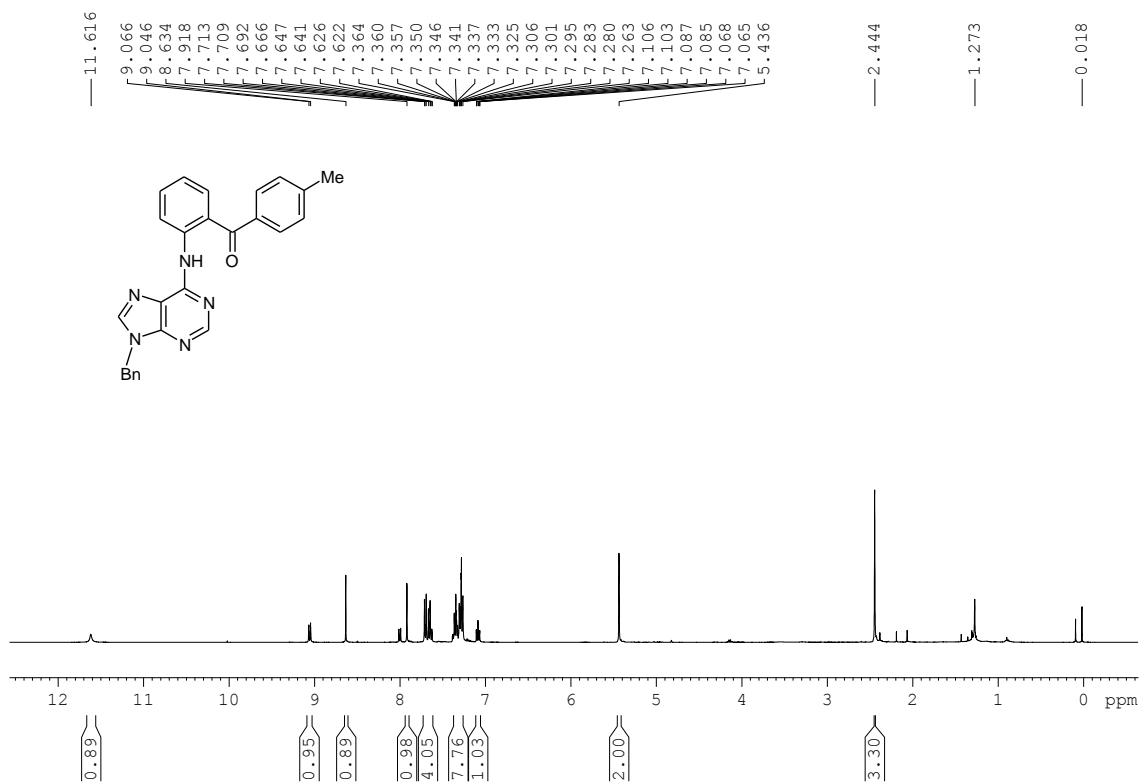

Figure S42.  $^1\text{H NMR}$  spectrum of compound **3e**

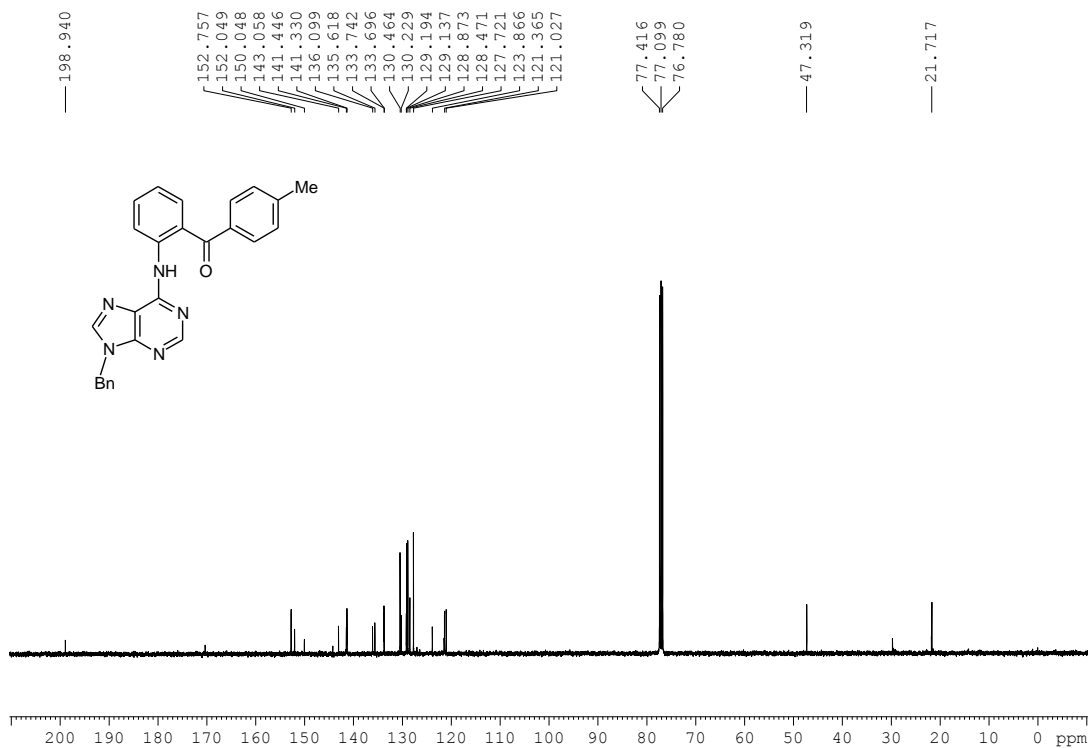

Figure S43.  $^{13}\text{C NMR}$  spectrum of compound **3e**

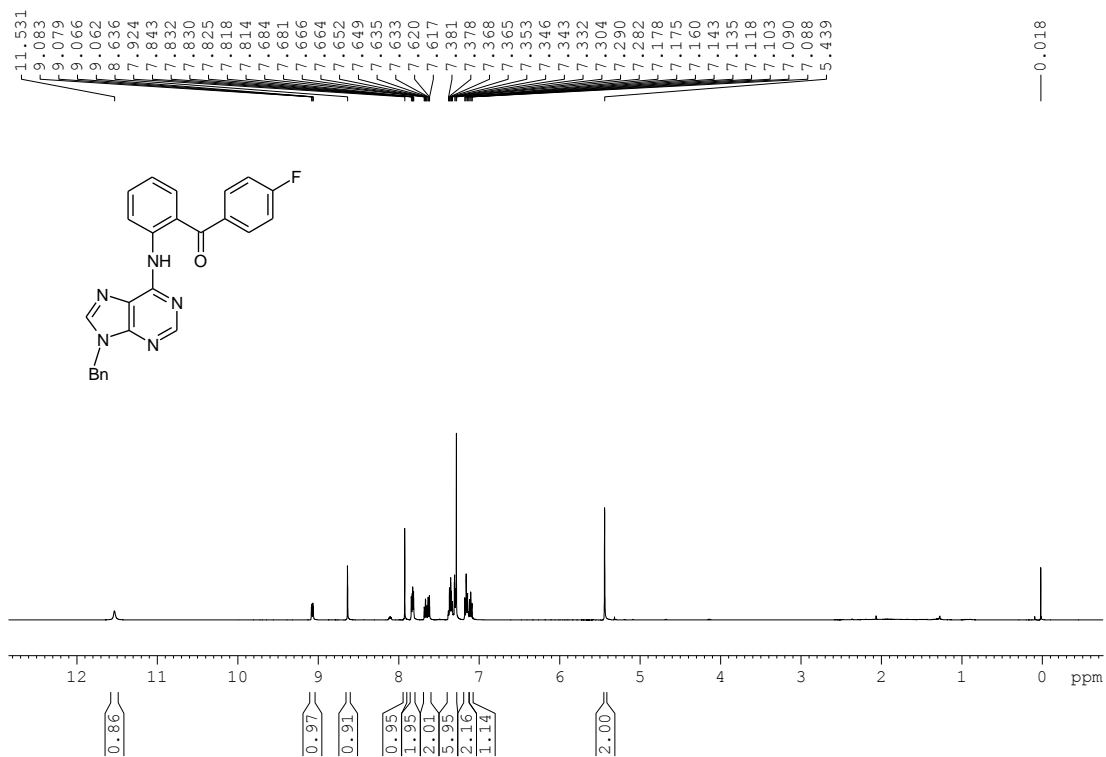

Figure S44. <sup>1</sup>H NMR spectrum of compound 3f

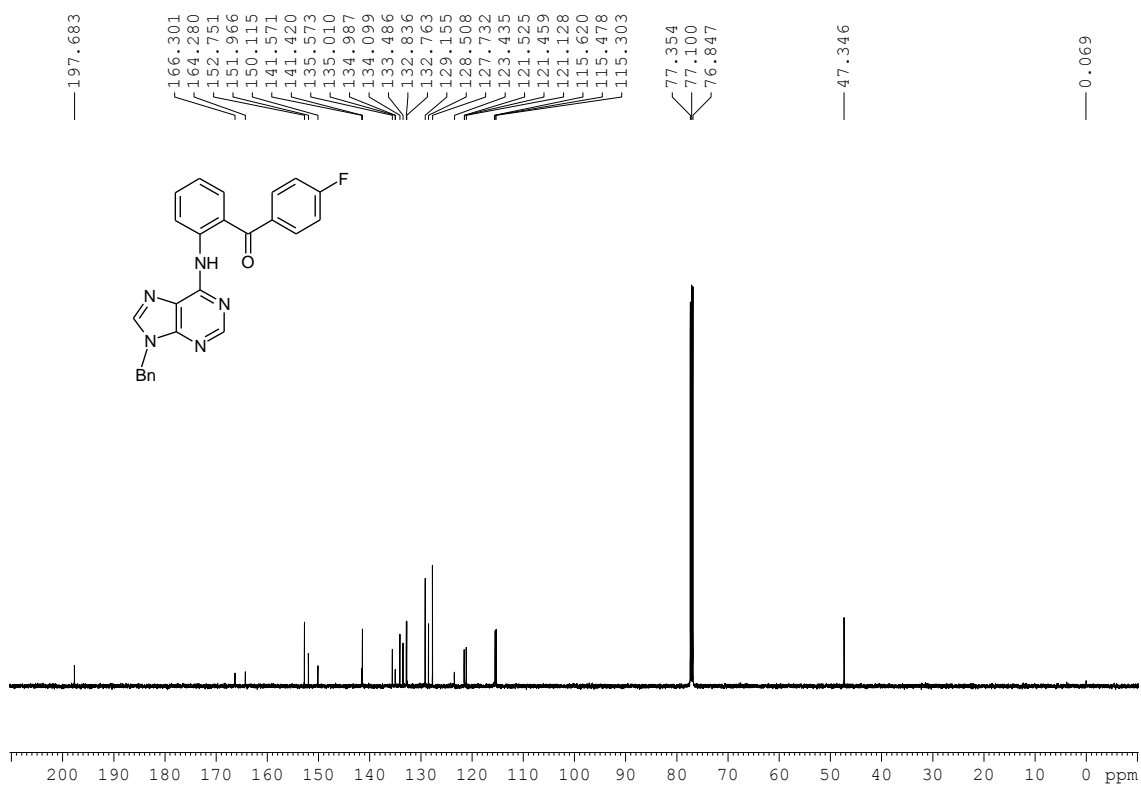

Figure S45. <sup>13</sup>C NMR spectrum of compound 3f



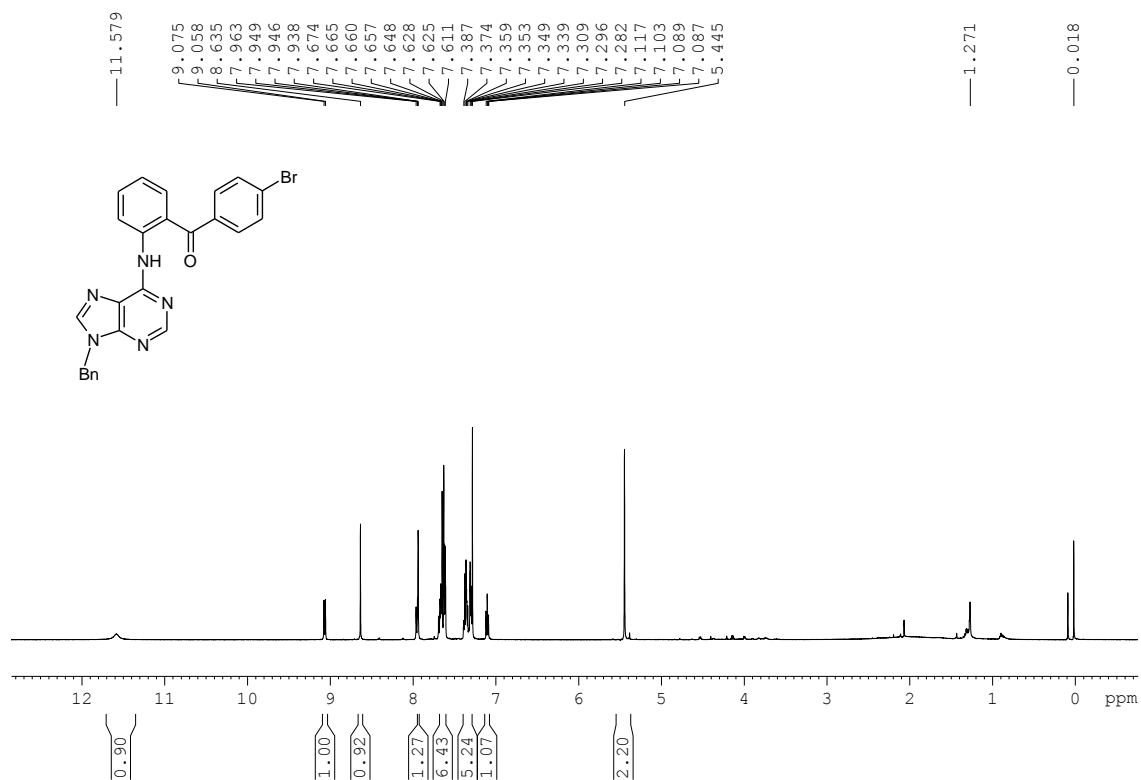

Figure S46.  $^1\text{H NMR}$  spectrum of compound 3g

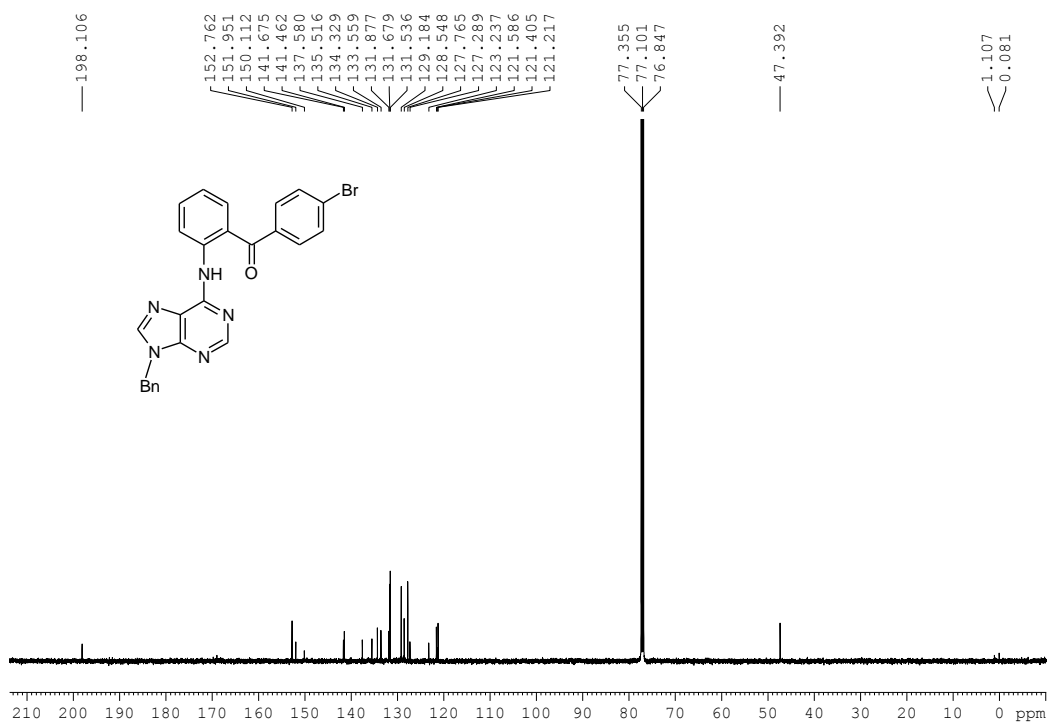

Figure S47.  $^{13}\text{C NMR}$  spectrum of compound 3g

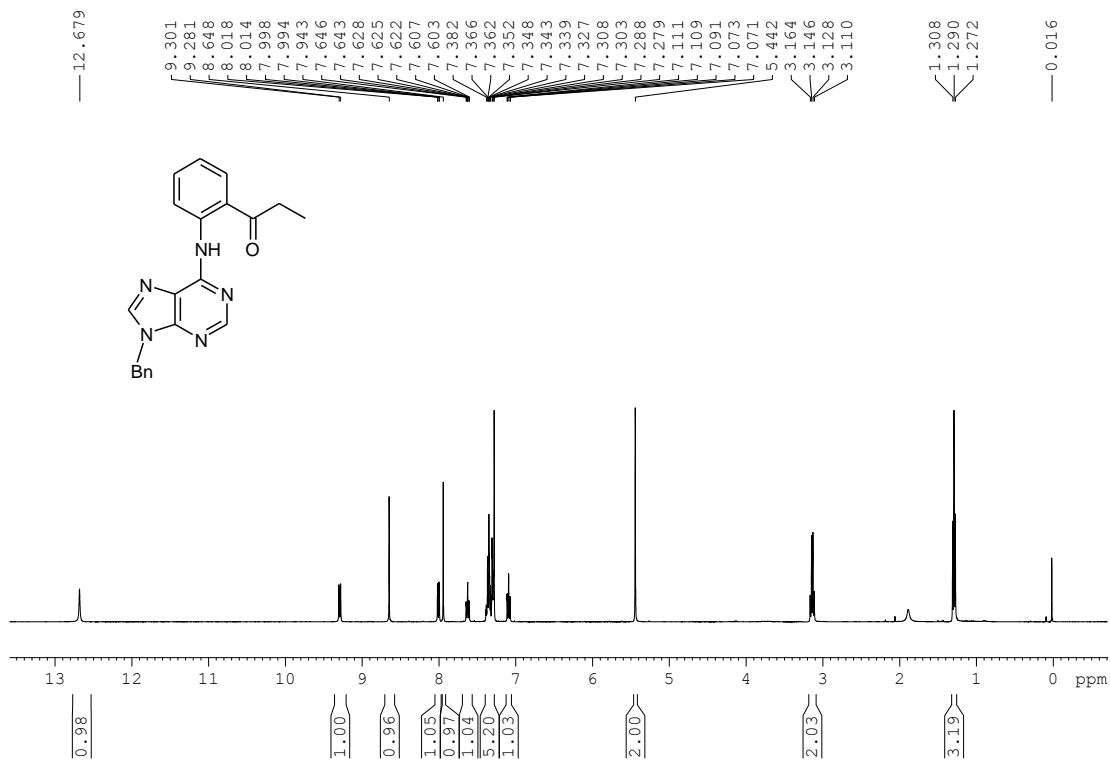

Figure S48. <sup>1</sup>H NMR spectrum of compound 3h

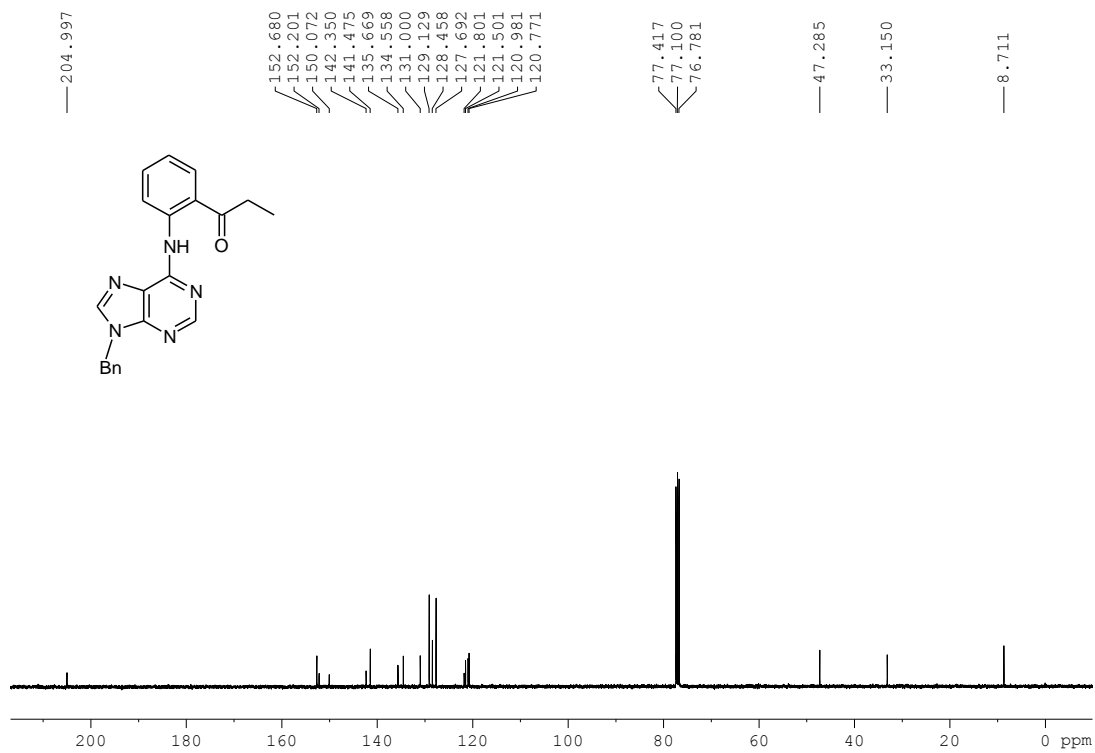

Figure S49. <sup>13</sup>C NMR spectrum of compound 3h
